# Supplementary material for: Prognostic Significance of the Loss of Heterozygosity of KRAS in Early-Stage Lung Adenocarcinoma
Source: Front Oncol. 2022 Apr 29;12:873532. doi: 10.3389/fonc.2022.873532 (PMC9098994; doi:10.3389/fonc.2022.873532)
Supplement: Supplementary file 2 [file Table_1.xlsx]

## Sheet: Table.S1
Table S1: Univariate and bivariate cox proportional hazard regression analyses performed to adjust for any effects of potential confounders in the association of KRAS LOH.
Potential confounders	OS		RFS
	HR for KRAS LOH	P value	HR for KRAS LOH	P value
Unadjusted base model	0.653 (0.449-0.948)	0.025	0.637 (0.385-1.055)	0.08
Adjusted for Age	0.633 (0.434-0.926)	0.018	0.636 (0.384-1.054)	0.079
Adjusted for Sex	0.649 (0.447-0.943)	0.024	0.636 (0.383-1.055)	0.079
Adjusted for Stage	0.682 (0.465-0.992)	0.046	0.716 (0.430-1.194)	0.201
Adjusted for ECOG	0.748 (0.507-1.105)	0.145	0.702 (0.413-1.195)	0.193
Adjusted for GII	0.643 (0.438-0.943)	0.024	0.591 (0.352-0.990)	0.046
Adjusted for EGFR mutation	0.657 (0.452-0.954)	0.027	0.647 (0.390-1.073)	0.091
Adjusted for KARS mutation	0.681 (0.468-0.990)	0.044	0.678 (0.407-1.129)	0.135
Adjusted for KARS expression	0.691 (0.458-1.040)	0.076	0.666 (0.377-1.178)	0.163

## Sheet: Table.S2
Table S2: Correlation of genes for their mRNA expression and copy number (r>0.4)
GeneSymbol	Est	P-value	P.adjust
KAT6A	0.680158	4.20794e-28	7.53095e-24
PI4KB	0.671679	3.33517e-27	2.98447e-23
GOLGA7	0.657819	8.51587e-26	5.08029e-22
VPS72	0.650105	4.80581e-25	2.15024e-21
MRPL9	0.649042	6.07555e-25	2.17468e-21
MDM2	0.644091	1.78945e-24	4.52661e-21
DUS4L	0.643852	1.88411e-24	4.52661e-21
RRAGA	0.643522	2.02341e-24	4.52661e-21
SNX27	0.642941	2.29297e-24	4.5597e-21
IK	0.641085	3.41417e-24	6.11034e-21
MED6	0.640237	4.09198e-24	6.65764e-21
C19orf12	0.637254	7.69951e-24	1.14832e-20
KLHL9	0.63653	8.96682e-24	1.19006e-20
TMEM68	0.636294	9.4232e-24	1.19006e-20
ENSA	0.635811	1.04275e-23	1.19006e-20
RBM22	0.635715	1.06392e-23	1.19006e-20
GZF1	0.634934	1.25283e-23	1.31893e-20
ARMC1	0.634177	1.46736e-23	1.45896e-20
CEP89	0.632801	1.95305e-23	1.83967e-20
MON2	0.631306	2.66073e-23	2.38096e-20
PRPF4B	0.630888	2.9001e-23	2.47158e-20
COPS6	0.62998	3.49506e-23	2.84323e-20
CDC16	0.629338	3.98699e-23	3.1024e-20
CNOT2	0.626458	7.16758e-23	5.34493e-20
METTL1	0.62611	7.69184e-23	5.50644e-20
AARS2	0.624982	9.65928e-23	6.64893e-20
TRAPPC8	0.623275	1.36101e-22	9.02148e-20
KIAA1191	0.622639	1.5458e-22	9.88043e-20
PPP2R3C	0.62042	2.40422e-22	1.48374e-19
INTS4	0.619861	2.68562e-22	1.60215e-19
WAC	0.619046	3.1549e-22	1.8214e-19
POP4	0.616693	5.00893e-22	2.8014e-19
SS18	0.615773	5.99476e-22	3.18936e-19
DCP1A	0.615595	6.20718e-22	3.18936e-19
MRPL51	0.61557	6.23723e-22	3.18936e-19
RAB21	0.615365	6.49188e-22	3.22737e-19
RSBN1	0.614258	8.05012e-22	3.89386e-19
ZNF687	0.613993	8.47324e-22	3.99067e-19
ARMC10	0.613695	8.97729e-22	4.0938e-19
TTC1	0.613597	9.1497e-22	4.0938e-19
PPFIA1	0.613267	9.75236e-22	4.25703e-19
PAF1	0.612532	1.12385e-21	4.78895e-19
RAD1	0.610548	1.64505e-21	6.84687e-19
WBP11	0.610237	1.74584e-21	7.1012e-19
TBC1D9B	0.609654	1.95176e-21	7.76236e-19
DNTTIP2	0.608263	2.54307e-21	9.30852e-19
TPCN2	0.608229	2.55976e-21	9.30852e-19
SETDB1	0.608212	2.56778e-21	9.30852e-19
RPAP2	0.608175	2.58621e-21	9.30852e-19
SNAPC3	0.608087	2.62943e-21	9.30852e-19
ARNT	0.608041	2.65259e-21	9.30852e-19
ALG8	0.607832	2.76012e-21	9.49958e-19
ADIPOR2	0.607253	3.07997e-21	1.04004e-18
OTUD6B	0.604722	4.9612e-21	1.64427e-18
TJAP1	0.602414	7.6333e-21	2.48388e-18
MRM3	0.60089	1.01282e-20	3.23686e-18
MRPS22	0.60037	1.11503e-20	3.50099e-18
PRUNE1	0.5995	1.3089e-20	4.03886e-18
CSPP1	0.598605	1.54317e-20	4.62834e-18
STK3	0.598542	1.56091e-20	4.62834e-18
TMEM126A	0.598485	1.57752e-20	4.62834e-18
DDHD2	0.598108	1.69036e-20	4.86028e-18
ATAD1	0.598042	1.71089e-20	4.86028e-18
WDR70	0.596707	2.18383e-20	6.10686e-18
NXT1	0.595516	2.71199e-20	7.46714e-18
TERF1	0.595264	2.83876e-20	7.69778e-18
NDUFS4	0.594833	3.06989e-20	8.20028e-18
SEC61G	0.594429	3.30232e-20	8.69142e-18
FASTKD3	0.593044	4.24016e-20	1.07137e-17
ANKRD27	0.593036	4.24644e-20	1.07137e-17
AEBP2	0.593031	4.25029e-20	1.07137e-17
FKBP3	0.592943	4.31771e-20	1.0724e-17
KIAA0391	0.592871	4.37423e-20	1.0724e-17
PTK2	0.592533	4.64836e-20	1.12421e-17
RASA1	0.592376	4.7815e-20	1.13514e-17
MRPL21	0.592331	4.82038e-20	1.13514e-17
ZMAT2	0.592254	4.88698e-20	1.13587e-17
PPP1R35	0.592113	5.01263e-20	1.15014e-17
RANBP9	0.591315	5.78269e-20	1.31004e-17
UQCRFS1	0.590817	6.32126e-20	1.41414e-17
SLU7	0.590376	6.83937e-20	1.51116e-17
TAF2	0.590017	7.29169e-20	1.59146e-17
HDAC3	0.589776	7.61065e-20	1.64106e-17
COPS7A	0.588999	8.73849e-20	1.86182e-17
BUD13	0.588083	1.02778e-19	2.16402e-17
PPP2R5D	0.587291	1.18221e-19	2.46024e-17
MTERF3	0.586977	1.2496e-19	2.57058e-17
POLR3C	0.586131	1.45036e-19	2.94967e-17
RARS	0.584524	1.92199e-19	3.86493e-17
COL4A3BP	0.584377	1.97201e-19	3.92145e-17
CXorf40B	0.58363	2.24663e-19	4.41846e-17
FRS2	0.583508	2.2949e-19	4.46433e-17
IMP3	0.582236	2.8629e-19	5.50938e-17
RING1	0.581839	3.06695e-19	5.83928e-17
NDFIP1	0.581652	3.16765e-19	5.96752e-17
YY1AP1	0.581441	3.28554e-19	6.12514e-17
CAST	0.581335	3.34605e-19	6.17364e-17
BRMS1L	0.580152	4.10396e-19	7.39843e-17
EAPP	0.580112	4.13231e-19	7.39843e-17
C6orf89	0.58011	4.1339e-19	7.39843e-17
GPBP1	0.580042	4.18243e-19	7.41119e-17
FBXO38	0.579159	4.86775e-19	8.54099e-17
SCRIB	0.578159	5.77753e-19	1.00389e-16
DDX56	0.578038	5.89851e-19	1.01505e-16
PUF60	0.577896	6.04327e-19	1.03006e-16
EMG1	0.577744	6.20206e-19	1.04715e-16
TBC1D15	0.577261	6.73494e-19	1.1211e-16
SCFD1	0.577235	6.76534e-19	1.1211e-16
PAFAH1B1	0.577055	6.97534e-19	1.14252e-16
TNPO3	0.577016	7.02227e-19	1.14252e-16
BAG4	0.576213	8.05023e-19	1.29797e-16
SMAD2	0.575924	8.45552e-19	1.35115e-16
ORC5	0.575862	8.5449e-19	1.35335e-16
RNF115	0.575688	8.80079e-19	1.38165e-16
NDUFB9	0.575473	9.12698e-19	1.4204e-16
RCL1	0.57542	9.20914e-19	1.42083e-16
POLR2I	0.575214	9.53666e-19	1.45878e-16
DTNBP1	0.573925	1.1857e-18	1.79834e-16
LRRC47	0.57302	1.38066e-18	2.07644e-16
ATP6V0E1	0.572603	1.48088e-18	2.20861e-16
RCOR3	0.572536	1.49778e-18	2.21535e-16
ENY2	0.572411	1.52946e-18	2.24366e-16
PSMB4	0.572097	1.61193e-18	2.34542e-16
ICE1	0.571894	1.66767e-18	2.40696e-16
FAF2	0.571422	1.80497e-18	2.58428e-16
ARFGEF1	0.571234	1.86258e-18	2.6456e-16
CWC15	0.570894	1.97124e-18	2.7779e-16
TYW1	0.569362	2.54355e-18	3.5564e-16
SNX6	0.569007	2.69784e-18	3.74289e-16
PPP2R2D	0.567663	3.3695e-18	4.63876e-16
YTHDF3	0.567554	3.43073e-18	4.687e-16
UBE2V2	0.566984	3.76848e-18	5.10943e-16
THAP7	0.56683	3.86537e-18	5.1716e-16
RAD21	0.566819	3.87213e-18	5.1716e-16
FBXW11	0.566411	4.14118e-18	5.48998e-16
ZSCAN9	0.566334	4.19393e-18	5.51903e-16
MRPS28	0.566239	4.25976e-18	5.56474e-16
MSTO1	0.565733	4.62905e-18	6.00334e-16
COPB2	0.56538	4.90429e-18	6.31242e-16
MTF2	0.565338	4.93791e-18	6.31242e-16
C1orf50	0.564825	5.37029e-18	6.81646e-16
NDUFA13	0.564221	5.92686e-18	7.46993e-16
LZTR1	0.564153	5.99366e-18	7.50129e-16
TIMMDC1	0.563925	6.2204e-18	7.731e-16
POLR1D	0.562842	7.41813e-18	9.15602e-16
NGDN	0.562775	7.49948e-18	9.19302e-16
FNTA	0.562587	7.73229e-18	9.41393e-16
CUL4A	0.561961	8.55724e-18	1.03479e-15
CCNK	0.561643	9.00984e-18	1.07903e-15
VCPIP1	0.561619	9.04364e-18	1.07903e-15
RPRD1A	0.561457	9.28442e-18	1.10042e-15
RPP38	0.561148	9.75916e-18	1.14908e-15
TIMM50	0.560096	1.1562e-17	1.35245e-15
POLR2J	0.559591	1.25403e-17	1.44978e-15
ROCK1	0.559583	1.25561e-17	1.44978e-15
MTAP	0.559497	1.27304e-17	1.454e-15
USP21	0.559363	1.30079e-17	1.454e-15
CNOT7	0.559339	1.30575e-17	1.454e-15
SRP54	0.559319	1.30992e-17	1.454e-15
CSDE1	0.559296	1.31488e-17	1.454e-15
RIPK1	0.559295	1.31498e-17	1.454e-15
ZNF644	0.55929	1.31613e-17	1.454e-15
BAZ1A	0.559082	1.36086e-17	1.49419e-15
FADD	0.558869	1.40812e-17	1.53666e-15
SLC25A44	0.558776	1.42913e-17	1.55013e-15
TUBGCP3	0.558713	1.44371e-17	1.55651e-15
MRS2	0.558482	1.49797e-17	1.60258e-15
MAD2L1BP	0.558456	1.50435e-17	1.60258e-15
RALGAPB	0.558344	1.53146e-17	1.6218e-15
ZNF24	0.557859	1.65495e-17	1.74228e-15
ERGIC1	0.55764	1.71379e-17	1.79114e-15
PUS3	0.557612	1.72139e-17	1.79114e-15
NUP107	0.557283	1.81401e-17	1.87661e-15
LSM1	0.557072	1.87617e-17	1.92976e-15
TAF11	0.557	1.89771e-17	1.94076e-15
URI1	0.556465	2.06628e-17	2.09575e-15
RALGAPA1	0.556446	2.07268e-17	2.09575e-15
CHMP2B	0.556346	2.10574e-17	2.11721e-15
CNOT4	0.556209	2.15199e-17	2.15163e-15
INTS8	0.555911	2.25637e-17	2.23119e-15
MALSU1	0.555911	2.2565e-17	2.23119e-15
APH1A	0.55579	2.30023e-17	2.26193e-15
RNF7	0.555738	2.31909e-17	2.26802e-15
CHCHD7	0.555472	2.41899e-17	2.35286e-15
GLOD4	0.555207	2.52267e-17	2.44045e-15
TCEA1	0.555094	2.56799e-17	2.47093e-15
EID2	0.554742	2.71526e-17	2.59867e-15
TESK1	0.554091	3.00878e-17	2.86426e-15
VDAC3	0.553874	3.11334e-17	2.93922e-15
NDUFA9	0.55386	3.12037e-17	2.93922e-15
CSNK1A1	0.553154	3.48684e-17	3.26723e-15
PCID2	0.552967	3.59129e-17	3.34756e-15
CUL1	0.552494	3.86751e-17	3.58636e-15
ZBTB5	0.552274	4.00353e-17	3.69336e-15
COA4	0.552231	4.03084e-17	3.69948e-15
CEP57	0.5521	4.11409e-17	3.75662e-15
CRNKL1	0.551983	4.18997e-17	3.80649e-15
BTF3	0.551735	4.35588e-17	3.93723e-15
TRIO	0.551521	4.50422e-17	4.05086e-15
GPATCH1	0.550732	5.0946e-17	4.5589e-15
PHF20L1	0.550653	5.15804e-17	4.59271e-15
FBXO25	0.55023	5.50923e-17	4.88112e-15
TBP	0.549673	6.00736e-17	5.29014e-15
SMU1	0.549649	6.03e-17	5.29014e-15
RNF38	0.549187	6.47822e-17	5.65565e-15
TMEM126B	0.549137	6.52838e-17	5.67177e-15
GNAI3	0.549074	6.59323e-17	5.6868e-15
RUFY1	0.549042	6.62577e-17	5.6868e-15
PSMD8	0.549027	6.64101e-17	5.6868e-15
FAM192A	0.548918	6.75419e-17	5.75618e-15
DERA	0.548323	7.40623e-17	6.28195e-15
CLTA	0.547912	7.89115e-17	6.6617e-15
MDM1	0.547104	8.93918e-17	7.51101e-15
YARS2	0.546855	9.28862e-17	7.76815e-15
SLC35C2	0.546615	9.63788e-17	8.02275e-15
ULK2	0.546571	9.70273e-17	8.03934e-15
ZNF565	0.546119	1.04003e-16	8.57761e-15
SON	0.545945	1.06821e-16	8.76964e-15
POLR1C	0.545155	1.2057e-16	9.83938e-15
TRIM33	0.545134	1.20951e-16	9.83938e-15
MRPL46	0.545043	1.22655e-16	9.93284e-15
ARF5	0.54478	1.27692e-16	1.02942e-14
MTFR1	0.544609	1.31064e-16	1.05186e-14
LYSMD1	0.544392	1.35486e-16	1.08249e-14
TM2D2	0.54395	1.44928e-16	1.15279e-14
TBPL1	0.543849	1.47173e-16	1.16546e-14
HARS2	0.54335	1.58802e-16	1.25202e-14
NDUFS6	0.543273	1.60672e-16	1.2612e-14
ZFAND3	0.543169	1.63237e-16	1.27575e-14
DPY19L1	0.543053	1.6612e-16	1.29263e-14
COX16	0.542899	1.7006e-16	1.31756e-14
ST7L	0.542694	1.75453e-16	1.35163e-14
TCAIM	0.54266	1.76354e-16	1.35163e-14
JADE2	0.542622	1.77372e-16	1.35163e-14
MICU2	0.542618	1.77479e-16	1.35163e-14
C8orf76	0.542373	1.84209e-16	1.39694e-14
LRIG2	0.542055	1.93289e-16	1.45962e-14
ZFC3H1	0.542024	1.94208e-16	1.46039e-14
ERICH1	0.541923	1.97195e-16	1.47666e-14
ARPC1A	0.541774	2.01691e-16	1.50083e-14
MOCS2	0.541761	2.02101e-16	1.50083e-14
DCAF13	0.541649	2.05548e-16	1.52012e-14
FBXL14	0.541472	2.1113e-16	1.55498e-14
PPP4R2	0.541151	2.21603e-16	1.62542e-14
KIN	0.541112	2.22916e-16	1.62796e-14
ZFAND1	0.541087	2.23769e-16	1.62796e-14
CTBP1	0.540693	2.37462e-16	1.72059e-14
PMS2P1	0.539475	2.85215e-16	2.05826e-14
MDC1	0.539351	2.90604e-16	2.08802e-14
KIAA1143	0.539326	2.91672e-16	2.08802e-14
DDX41	0.539134	3.00209e-16	2.13674e-14
CDC37L1	0.539119	3.00865e-16	2.13674e-14
SLC52A2	0.539047	3.04162e-16	2.15161e-14
NSA2	0.538919	3.10042e-16	2.18458e-14
PPP6R3	0.53888	3.11869e-16	2.18883e-14
CGRRF1	0.538537	3.28289e-16	2.29507e-14
ZKSCAN4	0.538259	3.42249e-16	2.38336e-14
UBE2W	0.538001	3.55701e-16	2.46743e-14
CLK4	0.537921	3.60001e-16	2.48601e-14
DAGLB	0.537897	3.61286e-16	2.48601e-14
SIL1	0.537874	3.62546e-16	2.48601e-14
SDHAF1	0.537748	3.6942e-16	2.52347e-14
SHARPIN	0.53764	3.75432e-16	2.55479e-14
ASNSD1	0.537427	3.8754e-16	2.6272e-14
SPTLC1	0.537008	4.12504e-16	2.78588e-14
RNF216	0.536815	4.24573e-16	2.85661e-14
NECAP1	0.536753	4.28452e-16	2.87191e-14
COG2	0.536639	4.35828e-16	2.91046e-14
GPATCH2	0.536404	4.51302e-16	3.00258e-14
GLMN	0.536307	4.57856e-16	3.03491e-14
UHRF2	0.536258	4.61207e-16	3.04584e-14
CLPTM1L	0.53612	4.70763e-16	3.08677e-14
DNAJC2	0.536119	4.70854e-16	3.08677e-14
TGS1	0.535821	4.92097e-16	3.21425e-14
DPP8	0.535728	4.98944e-16	3.24713e-14
RNF139	0.535358	5.2713e-16	3.41813e-14
TRIM13	0.535157	5.4299e-16	3.5043e-14
ALS2	0.535141	5.44335e-16	3.5043e-14
PICALM	0.535006	5.55292e-16	3.56203e-14
ANGEL2	0.534801	5.72349e-16	3.65833e-14
TAX1BP1	0.53465	5.85323e-16	3.72794e-14
MRPL3	0.53447	6.01058e-16	3.81458e-14
HECTD1	0.534383	6.08841e-16	3.85033e-14
ZDHHC6	0.53434	6.12693e-16	3.86104e-14
RNMT	0.534269	6.19201e-16	3.88837e-14
UBA2	0.533897	6.54147e-16	4.09345e-14
ZC3HC1	0.533809	6.62647e-16	4.13219e-14
ANKRD49	0.533139	7.31374e-16	4.54493e-14
UBXN2B	0.533114	7.34069e-16	4.54589e-14
CHORDC1	0.532898	7.5769e-16	4.67599e-14
2009-03-01	0.532278	8.29898e-16	5.10401e-14
CCDC77	0.532115	8.49958e-16	5.19181e-14
ZNF354B	0.532115	8.49975e-16	5.19181e-14
EXOSC3	0.531994	8.6519e-16	5.26677e-14
SF3B5	0.531786	8.91967e-16	5.41137e-14
NDUFS3	0.531502	9.29839e-16	5.62207e-14
TBC1D23	0.531392	9.4495e-16	5.6942e-14
PDCD5	0.531329	9.5369e-16	5.70847e-14
PLGRKT	0.531329	9.53697e-16	5.70847e-14
LNPEP	0.531078	9.89304e-16	5.90186e-14
EXOC8	0.531016	9.9829e-16	5.92878e-14
UBA3	0.531001	1.00044e-15	5.92878e-14
DROSHA	0.530931	1.01072e-15	5.96994e-14
MRPS31	0.530894	1.01625e-15	5.98283e-14
COX6C	0.530731	1.04068e-15	6.10658e-14
SNRPD2	0.530691	1.04678e-15	6.12229e-14
DDX27	0.5304	1.09216e-15	6.36688e-14
R3HDM2	0.530114	1.13857e-15	6.61588e-14
NFRKB	0.529923	1.17062e-15	6.77751e-14
SRPK2	0.529904	1.17395e-15	6.77751e-14
TAF7	0.529835	1.18584e-15	6.82412e-14
VPS13B	0.529714	1.20687e-15	6.92287e-14
RAB2A	0.529668	1.21494e-15	6.94688e-14
PFDN4	0.529537	1.2383e-15	7.05793e-14
GRHPR	0.529436	1.25664e-15	7.13973e-14
NEMF	0.529308	1.2802e-15	7.25057e-14
CTTN	0.529206	1.29934e-15	7.33571e-14
VTI1A	0.528938	1.35086e-15	7.60263e-14
MTF1	0.528893	1.35955e-15	7.62755e-14
IGHMBP2	0.528779	1.38218e-15	7.73027e-14
PHB2	0.528723	1.39362e-15	7.76996e-14
DRG2	0.528587	1.42123e-15	7.89933e-14
EXOSC4	0.528554	1.42803e-15	7.9125e-14
PITPNA	0.528286	1.4845e-15	8.20002e-14
NIPBL	0.528251	1.4921e-15	8.21667e-14
NSUN3	0.528187	1.50602e-15	8.26785e-14
FOCAD	0.528051	1.53589e-15	8.40609e-14
ZNHIT1	0.527987	1.55013e-15	8.45813e-14
SNX4	0.52777	1.5997e-15	8.70205e-14
FDFT1	0.527507	1.66152e-15	9.01096e-14
TIMM22	0.527478	1.66855e-15	9.02175e-14
RAP1B	0.527319	1.70722e-15	9.20302e-14
UBE4A	0.527222	1.73134e-15	9.30505e-14
PTTG1IP	0.527101	1.76162e-15	9.43943e-14
B4GALT3	0.527058	1.7727e-15	9.45426e-14
ECD	0.527049	1.77495e-15	9.45426e-14
DCTN6	0.52697	1.79536e-15	9.53458e-14
TRIM41	0.526698	1.86713e-15	9.88639e-14
UBA52	0.526556	1.90549e-15	1.00353e-13
TRAPPC13	0.526553	1.90647e-15	1.00353e-13
CHD7	0.526355	1.9614e-15	1.02942e-13
VPS4A	0.526319	1.97182e-15	1.03186e-13
MAPK7	0.525939	2.08241e-15	1.08631e-13
SLC35A3	0.52592	2.08801e-15	1.08631e-13
SHQ1	0.525882	2.09934e-15	1.08665e-13
DEDD	0.525878	2.10081e-15	1.08665e-13
MRPL52	0.525827	2.11614e-15	1.09139e-13
CHD9	0.525807	2.12216e-15	1.09139e-13
SUPV3L1	0.525757	2.13739e-15	1.09607e-13
STRAP	0.525621	2.17961e-15	1.11015e-13
APEX1	0.525615	2.18143e-15	1.11015e-13
ZNF212	0.525603	2.18528e-15	1.11015e-13
RANBP6	0.525589	2.18966e-15	1.11015e-13
RRS1	0.525443	2.23608e-15	1.13049e-13
FANCM	0.525338	2.26976e-15	1.14428e-13
TATDN1	0.525211	2.31165e-15	1.16212e-13
GLRX3	0.525059	2.3623e-15	1.18229e-13
CRYZL1	0.525052	2.36497e-15	1.18229e-13
PFDN1	0.524989	2.38611e-15	1.18953e-13
CCDC82	0.524734	2.47482e-15	1.23033e-13
PSENEN	0.524606	2.52052e-15	1.24958e-13
CREBRF	0.524564	2.53567e-15	1.25362e-13
SAP30BP	0.524483	2.56534e-15	1.26479e-13
GALNT10	0.52437	2.60696e-15	1.28178e-13
AP4S1	0.52431	2.62937e-15	1.28669e-13
SLC12A9	0.524305	2.63134e-15	1.28669e-13
EGFR	0.524157	2.68751e-15	1.31058e-13
VPS28	0.523779	2.83667e-15	1.37956e-13
TSPYL4	0.523426	2.98307e-15	1.44683e-13
AMBRA1	0.523396	2.99577e-15	1.44906e-13
NFX1	0.523376	3.00419e-15	1.44922e-13
POLR3A	0.523297	3.03805e-15	1.46161e-13
KLHL12	0.523162	3.09739e-15	1.48617e-13
MRFAP1L1	0.523027	3.15715e-15	1.5087e-13
CEP72	0.523018	3.16122e-15	1.5087e-13
ZBTB10	0.522982	3.17745e-15	1.51242e-13
UPF1	0.522843	3.24105e-15	1.53859e-13
WDR55	0.52277	3.27456e-15	1.55039e-13
CCDC174	0.522727	3.2946e-15	1.55576e-13
TMEM147	0.522679	3.31747e-15	1.56244e-13
MED20	0.52247	3.41726e-15	1.60522e-13
PEX1	0.522403	3.45009e-15	1.6164e-13
ATP6V1C1	0.522342	3.47994e-15	1.62612e-13
ZDHHC4	0.521995	3.65558e-15	1.70375e-13
METTL3	0.521962	3.67268e-15	1.70727e-13
MED15	0.521733	3.79353e-15	1.75593e-13
ASH2L	0.521715	3.80366e-15	1.75593e-13
CUX1	0.521709	3.8068e-15	1.75593e-13
RNF145	0.521468	3.93866e-15	1.81209e-13
ABCF1	0.521272	4.0494e-15	1.85826e-13
ZNF318	0.521231	4.07335e-15	1.86447e-13
G2E3	0.521038	4.18593e-15	1.91111e-13
PSMC1	0.520886	4.27675e-15	1.94761e-13
GPR89B	0.520764	4.35085e-15	1.97632e-13
ORC3	0.520727	4.37378e-15	1.98171e-13
PLPP5	0.520631	4.43321e-15	2.00356e-13
SCAMP3	0.520356	4.60853e-15	2.07755e-13
MRPL13	0.520267	4.66698e-15	2.09861e-13
MRPS35	0.520076	4.79428e-15	2.15046e-13
DCTN2	0.519816	4.97287e-15	2.22012e-13
UIMC1	0.519814	4.9744e-15	2.22012e-13
POP7	0.519781	4.99733e-15	2.2248e-13
COPS5	0.519762	5.01076e-15	2.22525e-13
C1orf52	0.519728	5.03516e-15	2.23055e-13
TTC8	0.519684	5.06625e-15	2.23878e-13
TBCC	0.519616	5.11525e-15	2.24969e-13
GEMIN4	0.519615	5.11607e-15	2.24969e-13
VPS4B	0.519597	5.12899e-15	2.24984e-13
ZSCAN16	0.519525	5.18119e-15	2.26718e-13
JTB	0.519473	5.21904e-15	2.27818e-13
LSM14A	0.51909	5.50782e-15	2.39838e-13
SNX13	0.519063	5.5285e-15	2.40154e-13
MIPOL1	0.519018	5.56334e-15	2.41083e-13
DIDO1	0.518925	5.63649e-15	2.43662e-13
TDRKH	0.518779	5.75281e-15	2.48092e-13
RALBP1	0.518718	5.80241e-15	2.49629e-13
GTF2B	0.518687	5.8277e-15	2.50116e-13
COX6B1	0.518633	5.87198e-15	2.51414e-13
TRRAP	0.518245	6.2004e-15	2.64151e-13
UMPS	0.518244	6.20114e-15	2.64151e-13
CREB3	0.518229	6.21375e-15	2.64151e-13
CDK4	0.517899	6.50778e-15	2.75995e-13
XPO4	0.517781	6.61603e-15	2.79922e-13
PABPC1	0.517736	6.65783e-15	2.80487e-13
KLHL22	0.517733	6.66072e-15	2.80487e-13
FBXO42	0.517571	6.81275e-15	2.86216e-13
WRAP73	0.517294	7.0824e-15	2.96847e-13
RPL8	0.517246	7.1294e-15	2.98119e-13
ZBTB41	0.51722	7.15557e-15	2.98516e-13
MRM2	0.517175	7.20076e-15	2.99702e-13
TPI1	0.516963	7.41677e-15	3.07976e-13
RNF6	0.51687	7.51305e-15	3.11252e-13
AGPAT3	0.51682	7.56587e-15	3.12717e-13
THG1L	0.516677	7.71772e-15	3.18258e-13
CCNB1IP1	0.516638	7.76054e-15	3.18687e-13
NSMCE2	0.516635	7.76374e-15	3.18687e-13
RPS6KB1	0.51649	7.92241e-15	3.24456e-13
POLK	0.516472	7.94141e-15	3.24492e-13
RAD50	0.516364	8.0616e-15	3.28148e-13
CHRAC1	0.516359	8.06755e-15	3.28148e-13
ZNF691	0.516309	8.12364e-15	3.2968e-13
ZFYVE21	0.51624	8.20212e-15	3.32112e-13
PSMC2	0.516189	8.26127e-15	3.3371e-13
LTV1	0.516173	8.27888e-15	3.3371e-13
AFF4	0.51601	8.46887e-15	3.39282e-13
DENND4C	0.51601	8.46899e-15	3.39282e-13
NCK1	0.516006	8.474e-15	3.39282e-13
FBXL17	0.51573	8.80533e-15	3.51761e-13
SAP18	0.515443	9.16248e-15	3.65214e-13
RB1CC1	0.5154	9.21745e-15	3.66588e-13
TFIP11	0.515049	9.67678e-15	3.84003e-13
ESD	0.514928	9.84136e-15	3.8967e-13
MED7	0.514743	1.00958e-14	3.98864e-13
KIAA2026	0.514589	1.0313e-14	4.06546e-13
NIT2	0.514498	1.04439e-14	4.10803e-13
NSUN2	0.514404	1.05807e-14	4.15271e-13
GSK3B	0.51424	1.08233e-14	4.23862e-13
HAX1	0.514127	1.09937e-14	4.29595e-13
SLC25A21-AS1	0.514109	1.10216e-14	4.29745e-13
CUL5	0.514028	1.11451e-14	4.33618e-13
ADCK5	0.514006	1.118e-14	4.34032e-13
PAK1IP1	0.513979	1.12207e-14	4.34667e-13
MAPK8	0.513912	1.13257e-14	4.37789e-13
TRIP11	0.513884	1.13695e-14	4.38535e-13
SKIV2L	0.513701	1.16598e-14	4.48764e-13
RIOK2	0.513674	1.17031e-14	4.49464e-13
TRMT10C	0.513643	1.17544e-14	4.50468e-13
SEC24C	0.513622	1.17881e-14	4.50794e-13
XPO5	0.513527	1.19434e-14	4.55759e-13
UBR7	0.513458	1.20575e-14	4.59135e-13
MAPK9	0.513239	1.24267e-14	4.72189e-13
CCT2	0.512941	1.2948e-14	4.90955e-13
COG5	0.51292	1.29838e-14	4.91269e-13
PEX5	0.512803	1.31948e-14	4.98201e-13
CCDC59	0.512762	1.32692e-14	4.99955e-13
ELF1	0.512668	1.34418e-14	5.05393e-13
DTD2	0.512623	1.35267e-14	5.07214e-13
C5orf22	0.512612	1.35469e-14	5.07214e-13
DCTN4	0.512536	1.36882e-14	5.11436e-13
PIGN	0.512388	1.39706e-14	5.20901e-13
NFYC	0.512331	1.40802e-14	5.23895e-13
HBS1L	0.512294	1.41516e-14	5.25459e-13
LRR1	0.512158	1.4419e-14	5.34278e-13
METTL4	0.512099	1.45345e-14	5.37448e-13
ERC1	0.511966	1.48023e-14	5.46219e-13
NAA50	0.51183	1.50815e-14	5.54988e-13
XPO7	0.51182	1.51019e-14	5.54988e-13
ARF6	0.51179	1.51658e-14	5.56194e-13
TBC1D20	0.511589	1.55889e-14	5.7054e-13
PTDSS1	0.511522	1.57324e-14	5.74619e-13
AP4M1	0.511406	1.59847e-14	5.82642e-13
TAF8	0.51136	1.60853e-14	5.85118e-13
CHD1L	0.511343	1.61229e-14	5.85298e-13
SLC30A9	0.511283	1.62548e-14	5.88891e-13
CLK2	0.511256	1.63157e-14	5.89902e-13
ARMC8	0.511035	1.6817e-14	6.06454e-13
MMS19	0.511024	1.68412e-14	6.06454e-13
NOSIP	0.510912	1.71023e-14	6.14617e-13
UBLCP1	0.510888	1.71579e-14	6.15379e-13
PSMD4	0.510794	1.73789e-14	6.22062e-13
EIF4H	0.510613	1.78149e-14	6.36393e-13
SUMO1	0.510589	1.78733e-14	6.36522e-13
GTF2H1	0.510582	1.78896e-14	6.36522e-13
COQ5	0.510509	1.80693e-14	6.4164e-13
MAK16	0.510402	1.83361e-14	6.49825e-13
TMEM161A	0.510179	1.89021e-14	6.68558e-13
CPSF4	0.510016	1.93275e-14	6.82257e-13
SDHA	0.50991	1.96073e-14	6.9077e-13
WDR89	0.509857	1.97511e-14	6.93261e-13
API5	0.509855	1.97554e-14	6.93261e-13
MIOS	0.509795	1.99164e-14	6.97542e-13
GMPR2	0.509767	1.9993e-14	6.98856e-13
TSPAN31	0.509682	2.02262e-14	7.05629e-13
RPA1	0.509659	2.02901e-14	7.06483e-13
RIC1	0.509482	2.07851e-14	7.22312e-13
NOL9	0.509426	2.09421e-14	7.2636e-13
MTCH1	0.509289	2.1336e-14	7.38589e-13
RNF138	0.509175	2.1672e-14	7.48772e-13
ERCC1	0.509083	2.19428e-14	7.56666e-13
SNW1	0.50889	2.2526e-14	7.75283e-13
ZCCHC9	0.508583	2.34856e-14	8.06759e-13
ANKRD16	0.508455	2.38968e-14	8.19312e-13
DDRGK1	0.508201	2.47349e-14	8.46426e-13
TRIM8	0.508152	2.48994e-14	8.5043e-13
MED29	0.507736	2.6341e-14	8.97953e-13
KATNA1	0.507674	2.65636e-14	9.03818e-13
TIAL1	0.507629	2.67234e-14	9.07532e-13
THUMPD1	0.507573	2.69287e-14	9.10964e-13
GRPEL1	0.507571	2.69359e-14	9.10964e-13
POGK	0.507559	2.69772e-14	9.10964e-13
RHNO1	0.507529	2.70884e-14	9.12996e-13
FGFR1OP2	0.507436	2.7433e-14	9.22872e-13
HCG18	0.50739	2.76019e-14	9.26814e-13
UQCRQ	0.507322	2.78566e-14	9.33612e-13
C12orf43	0.507282	2.80066e-14	9.36885e-13
C3orf38	0.507183	2.83838e-14	9.47733e-13
MTBP	0.507039	2.89432e-14	9.6461e-13
WDYHV1	0.506905	2.947e-14	9.80343e-13
NIT1	0.506881	2.95659e-14	9.81707e-13
ARL6IP5	0.506781	2.99693e-14	9.93261e-13
SIAH2	0.506682	3.03698e-14	1.00467e-12
DERL2	0.506478	3.12159e-14	1.03076e-12
NR2C2AP	0.506445	3.13558e-14	1.03347e-12
GON4L	0.50627	3.21037e-14	1.05618e-12
OTULIN	0.506164	3.25672e-14	1.06946e-12
MAGOHB	0.506143	3.26576e-14	1.07047e-12
MRPS17	0.506072	3.29695e-14	1.07856e-12
RRP36	0.50606	3.3025e-14	1.07856e-12
WDR26	0.505952	3.35089e-14	1.09237e-12
MCUR1	0.505922	3.3642e-14	1.09471e-12
MEA1	0.505846	3.39883e-14	1.10397e-12
HLCS	0.505814	3.41342e-14	1.1067e-12
GTF3A	0.505746	3.44472e-14	1.11483e-12
CCDC43	0.505728	3.45325e-14	1.11558e-12
TBC1D14	0.505665	3.48248e-14	1.12299e-12
ZFYVE27	0.505649	3.49e-14	1.12339e-12
IKBKG	0.505577	3.52421e-14	1.13237e-12
NUP155	0.505559	3.53233e-14	1.13294e-12
CASP8AP2	0.505501	3.55997e-14	1.13976e-12
RPL29	0.505465	3.57746e-14	1.14332e-12
PEX19	0.505438	3.59052e-14	1.14545e-12
VIPAS39	0.505147	3.73362e-14	1.18898e-12
EPB41L4A-AS1	0.505088	3.76318e-14	1.19626e-12
DHX35	0.505039	3.78794e-14	1.202e-12
RMND5B	0.504886	3.86655e-14	1.22477e-12
ELP2	0.504664	3.98329e-14	1.25952e-12
LYRM2	0.504561	4.03846e-14	1.27272e-12
MRPL15	0.50456	4.03927e-14	1.27272e-12
BAZ1B	0.5041	4.29525e-14	1.351e-12
ERGIC2	0.504023	4.3397e-14	1.36259e-12
ZNF567	0.503918	4.40143e-14	1.37955e-12
MRPS11	0.503857	4.43726e-14	1.38835e-12
HAUS6	0.503772	4.4879e-14	1.40119e-12
COPS2	0.503762	4.49397e-14	1.40119e-12
TOPBP1	0.503289	4.78698e-14	1.48996e-12
USP47	0.503028	4.95608e-14	1.53991e-12
EIF3A	0.502997	4.97681e-14	1.54367e-12
BRIX1	0.502974	4.99178e-14	1.54564e-12
RAB2B	0.502884	5.05199e-14	1.56158e-12
PWWP2A	0.502834	5.08583e-14	1.56933e-12
FEM1C	0.502748	5.1447e-14	1.58476e-12
MAN2B2	0.502666	5.20098e-14	1.59935e-12
RUSC1	0.502652	5.21038e-14	1.59949e-12
PAFAH1B2	0.502512	5.30857e-14	1.62684e-12
EIF2B1	0.502452	5.35077e-14	1.63697e-12
AACS	0.502382	5.40075e-14	1.64944e-12
APTX	0.502314	5.45017e-14	1.65932e-12
DHX29	0.502312	5.45164e-14	1.65932e-12
CHCHD2	0.502284	5.47177e-14	1.66262e-12
ZNF133	0.502256	5.4921e-14	1.66597e-12
TAF4	0.501832	5.81035e-14	1.75952e-12
RANBP17	0.501624	5.97312e-14	1.80576e-12
NUP43	0.501549	6.03266e-14	1.82068e-12
TRIAP1	0.501449	6.11356e-14	1.84199e-12
N4BP1	0.501382	6.16785e-14	1.85523e-12
TRMT12	0.501357	6.18799e-14	1.85541e-12
CCM2	0.501356	6.18918e-14	1.85541e-12
NUDT19	0.501137	6.3712e-14	1.90678e-12
PRMT2	0.500817	6.64729e-14	1.98609e-12
LEMD3	0.500655	6.7908e-14	2.02383e-12
RWDD3	0.500649	6.79622e-14	2.02383e-12
CNOT6	0.500564	6.87319e-14	2.04335e-12
TOMM5	0.500448	6.97883e-14	2.07131e-12
DERL1	0.500221	7.19147e-14	2.13089e-12
RPS6	0.500029	7.37565e-14	2.18185e-12
POLM	0.499951	7.45278e-14	2.20103e-12
EIF2S1	0.499912	7.4912e-14	2.20873e-12
RNPEP	0.49979	7.61272e-14	2.24087e-12
HELB	0.499772	7.63053e-14	2.24242e-12
POFUT1	0.499701	7.70247e-14	2.25986e-12
PANK4	0.499525	7.88292e-14	2.30901e-12
FBL	0.49938	8.03502e-14	2.34972e-12
BAG5	0.499326	8.09261e-14	2.3627e-12
REEP5	0.499192	8.23589e-14	2.40061e-12
SOS2	0.499098	8.3391e-14	2.424e-12
NUDT5	0.499094	8.34319e-14	2.424e-12
SLC25A13	0.499062	8.37857e-14	2.43033e-12
NUP205	0.498654	8.83926e-14	2.55981e-12
PSMB1	0.498525	8.99032e-14	2.59935e-12
TMUB2	0.498384	9.15851e-14	2.64371e-12
FCHO2	0.498248	9.32328e-14	2.68694e-12
AHCYL1	0.49821	9.37065e-14	2.69625e-12
KLHL7	0.498011	9.61742e-14	2.76281e-12
C2orf69	0.49799	9.64404e-14	2.76602e-12
SAP30L	0.497874	9.79167e-14	2.80387e-12
NDUFB6	0.497695	1.00242e-13	2.86588e-12
MAP3K7	0.497671	1.00561e-13	2.87039e-12
TMEM106B	0.497508	1.02728e-13	2.92759e-12
TOX4	0.497356	1.04793e-13	2.9817e-12
CAPRIN1	0.497143	1.07754e-13	3.06107e-12
C12orf10	0.497105	1.08289e-13	3.07138e-12
DDX20	0.497068	1.08809e-13	3.08092e-12
GNPAT	0.497057	1.08969e-13	3.08092e-12
NFYA	0.496816	1.12451e-13	3.17435e-12
RAB3IP	0.496733	1.13677e-13	3.2039e-12
THOC7	0.496697	1.14219e-13	3.2141e-12
STK24	0.496566	1.16189e-13	3.26443e-12
CDC27	0.496538	1.16602e-13	3.27088e-12
MIEF1	0.496523	1.16832e-13	3.2722e-12
CBLL1	0.496449	1.17969e-13	3.29888e-12
TIMM10B	0.496205	1.21788e-13	3.40037e-12
CTTNBP2NL	0.49617	1.2234e-13	3.41048e-12
ZNF7	0.49597	1.25566e-13	3.49496e-12
MBNL2	0.495897	1.26764e-13	3.51437e-12
VPS16	0.495883	1.27003e-13	3.51437e-12
GOSR1	0.495882	1.27008e-13	3.51437e-12
ATG3	0.495873	1.27156e-13	3.51437e-12
EBLN3P	0.495868	1.27245e-13	3.51437e-12
CCNG1	0.495779	1.28728e-13	3.54984e-12
R3HCC1	0.495331	1.36446e-13	3.75688e-12
ZNF74	0.495228	1.38289e-13	3.79724e-12
TPMT	0.495225	1.38336e-13	3.79724e-12
NAPB	0.49521	1.38605e-13	3.79879e-12
RSPRY1	0.495169	1.3935e-13	3.81337e-12
MRFAP1	0.495103	1.40547e-13	3.84027e-12
BIN3	0.494968	1.43043e-13	3.9025e-12
ARFGEF2	0.494927	1.43804e-13	3.9173e-12
SCO1	0.494724	1.47637e-13	4.01558e-12
TMEM42	0.494692	1.48249e-13	4.02613e-12
UPF3A	0.494675	1.48584e-13	4.02911e-12
RAE1	0.49432	1.55569e-13	4.20863e-12
EEF1AKMT1	0.494315	1.55675e-13	4.20863e-12
NDUFB8	0.494228	1.57441e-13	4.24996e-12
VPS26B	0.494184	1.58335e-13	4.26765e-12
TBK1	0.493955	1.63094e-13	4.3893e-12
C18orf21	0.493893	1.64416e-13	4.41826e-12
CREBZF	0.493848	1.65378e-13	4.43743e-12
ZNF250	0.493814	1.6609e-13	4.44987e-12
EMSY	0.493668	1.69268e-13	4.52823e-12
DEK	0.493615	1.70425e-13	4.55198e-12
C1GALT1	0.493599	1.70774e-13	4.55198e-12
NOP2	0.493581	1.71171e-13	4.55198e-12
PSMA3	0.493581	1.71173e-13	4.55198e-12
COX7C	0.493554	1.71772e-13	4.56114e-12
TRIM52	0.493501	1.72954e-13	4.58573e-12
SLC39A4	0.49346	1.73869e-13	4.60302e-12
SUMO3	0.493449	1.74121e-13	4.60302e-12
MKRN1	0.493399	1.75242e-13	4.62581e-12
TMEM209	0.493371	1.75892e-13	4.63615e-12
NUCKS1	0.493339	1.76603e-13	4.64804e-12
INPP5K	0.493237	1.78957e-13	4.70308e-12
POC5	0.493199	1.79821e-13	4.71886e-12
PROSER3	0.493132	1.814e-13	4.75331e-12
SSBP1	0.493034	1.83703e-13	4.80187e-12
CRTC2	0.49303	1.8379e-13	4.80187e-12
LANCL2	0.49299	1.8474e-13	4.8157e-12
RPRD2	0.492982	1.84946e-13	4.8157e-12
OCIAD2	0.492974	1.85126e-13	4.8157e-12
KCTD9	0.492758	1.90351e-13	4.94442e-12
AHCTF1	0.492678	1.92326e-13	4.9885e-12
NVL	0.4926	1.94266e-13	5.03152e-12
ZFR	0.492577	1.94846e-13	5.03924e-12
IFT43	0.492388	1.99636e-13	5.15567e-12
LPCAT3	0.492324	2.01298e-13	5.1911e-12
DPY19L4	0.492209	2.04304e-13	5.26104e-12
WDR11	0.492196	2.04642e-13	5.26218e-12
C12orf4	0.49214	2.06126e-13	5.29107e-12
MLXIP	0.492122	2.06594e-13	5.29107e-12
GET4	0.49212	2.06652e-13	5.29107e-12
EMC2	0.491893	2.12765e-13	5.43979e-12
ZDHHC3	0.491799	2.15339e-13	5.49774e-12
SLC20A2	0.491666	2.19057e-13	5.5847e-12
ADAR	0.491635	2.19941e-13	5.59928e-12
YLPM1	0.491586	2.21306e-13	5.62602e-12
OGDH	0.491496	2.23876e-13	5.68327e-12
ZNF260	0.49123	2.31671e-13	5.87283e-12
CHMP7	0.491036	2.37493e-13	6.0119e-12
POLR2K	0.490965	2.39667e-13	6.05836e-12
SPINT2	0.490918	2.41106e-13	6.08613e-12
ANKS1A	0.49089	2.41974e-13	6.09945e-12
PHKB	0.490876	2.42399e-13	6.10156e-12
UBR1	0.49083	2.43828e-13	6.12893e-12
MRPS12	0.490763	2.45951e-13	6.17361e-12
OSGEP	0.49052	2.5371e-13	6.35945e-12
MED23	0.490201	2.64277e-13	6.61506e-12
SCAND1	0.490097	2.67802e-13	6.69392e-12
UBTD2	0.490082	2.68318e-13	6.69747e-12
RFXANK	0.49005	2.69408e-13	6.71531e-12
TRIM35	0.489917	2.74026e-13	6.82092e-12
ISY1	0.489834	2.76946e-13	6.88403e-12
AGK	0.489712	2.81289e-13	6.98228e-12
PTPRA	0.489517	2.88374e-13	7.14825e-12
PDCD2L	0.489473	2.90001e-13	7.17863e-12
ZNF146	0.489357	2.94338e-13	7.27593e-12
ATG12	0.489209	2.99915e-13	7.39695e-12
AKT2	0.489206	3.00061e-13	7.39695e-12
PPP2R2A	0.489102	3.04027e-13	7.48441e-12
ECHS1	0.489064	3.0552e-13	7.51085e-12
CWF19L2	0.489001	3.07959e-13	7.55357e-12
PSMC4	0.488998	3.08102e-13	7.55357e-12
MROH1	0.488946	3.10142e-13	7.58662e-12
KPNA3	0.488942	3.10298e-13	7.58662e-12
FAM220A	0.488852	3.13891e-13	7.66399e-12
STAU1	0.488492	3.28553e-13	8.01105e-12
PLAA	0.488458	3.29989e-13	8.03513e-12
ZBTB9	0.488432	3.31083e-13	8.05081e-12
NUP62	0.488399	3.32482e-13	8.07384e-12
ZHX1-C8orf76	0.488366	3.33879e-13	8.0968e-12
ARL8A	0.488167	3.4244e-13	8.29316e-12
NPM1	0.487898	3.543e-13	8.56878e-12
TRIM45	0.487885	3.54916e-13	8.57211e-12
SUGP1	0.487712	3.62779e-13	8.75022e-12
PSMC5	0.487695	3.63553e-13	8.75709e-12
CRTAP	0.487676	3.64424e-13	8.76625e-12
TMEM173	0.48765	3.65616e-13	8.78312e-12
CCDC25	0.487577	3.69025e-13	8.85313e-12
SHPK	0.487528	3.71333e-13	8.89659e-12
PCMT1	0.487486	3.73296e-13	8.93166e-12
SPSB3	0.487454	3.74823e-13	8.95623e-12
SUGT1	0.487231	3.85542e-13	9.20005e-12
PPP4R3A	0.487165	3.88767e-13	9.26161e-12
CEP295	0.487157	3.89156e-13	9.26161e-12
CEBPG	0.487043	3.9484e-13	9.37659e-12
SKP1	0.487039	3.95035e-13	9.37659e-12
ZSCAN26	0.4869	4.02012e-13	9.52954e-12
ISCA2	0.486884	4.02859e-13	9.53699e-12
ATMIN	0.48679	4.07676e-13	9.62934e-12
MRPL18	0.486787	4.07836e-13	9.62934e-12
TMEM251	0.486501	4.22847e-13	9.97061e-12
DHTKD1	0.486485	4.23696e-13	9.97748e-12
MRPL36	0.48645	4.25565e-13	1.00083e-11
ZNF100	0.486349	4.31027e-13	1.01235e-11
VANGL1	0.486276	4.35027e-13	1.01923e-11
NOL7	0.486274	4.35094e-13	1.01923e-11
VTA1	0.486046	4.4779e-13	1.0476e-11
S100PBP	0.485989	4.51044e-13	1.05383e-11
PDCD6IP	0.485937	4.53984e-13	1.05932e-11
HERC4	0.485793	4.62299e-13	1.07709e-11
ZFP62	0.485777	4.63255e-13	1.07709e-11
GPSM2	0.485774	4.63408e-13	1.07709e-11
GEMIN7	0.485751	4.64749e-13	1.07881e-11
SMAD4	0.48553	4.7788e-13	1.10785e-11
FANCE	0.485422	4.84412e-13	1.12154e-11
SNAP47	0.485407	4.8535e-13	1.12226e-11
GPN1	0.485337	4.89625e-13	1.13069e-11
ZNF16	0.485281	4.93058e-13	1.13715e-11
AK3	0.485256	4.94621e-13	1.13928e-11
ITPA	0.485066	5.06587e-13	1.16534e-11
MCM9	0.485041	5.08191e-13	1.16676e-11
ZMYM4	0.485036	5.08507e-13	1.16676e-11
B4GALT7	0.484962	5.13282e-13	1.17621e-11
STAM	0.484936	5.1494e-13	1.1785e-11
VPS33B	0.484862	5.1973e-13	1.18795e-11
POLG	0.484813	5.22971e-13	1.19383e-11
STYXL1	0.484616	5.36066e-13	1.22216e-11
SPCS2	0.484557	5.40031e-13	1.22964e-11
ALKBH8	0.484543	5.41005e-13	1.23029e-11
STRIP1	0.484437	5.4824e-13	1.24404e-11
NSRP1	0.484434	5.48443e-13	1.24404e-11
ZC3H15	0.484354	5.53959e-13	1.25479e-11
ATR	0.484343	5.54703e-13	1.25479e-11
LYPLA1	0.484335	5.55286e-13	1.25479e-11
C11orf58	0.484146	5.68567e-13	1.28318e-11
ALKBH4	0.484085	5.72982e-13	1.29152e-11
LARP4B	0.484074	5.73713e-13	1.29154e-11
PRPF3	0.483965	5.81653e-13	1.30777e-11
RPL26L1	0.483895	5.86776e-13	1.31763e-11
ACTR3B	0.483777	5.95509e-13	1.33557e-11
PARK7	0.483751	5.97386e-13	1.3381e-11
TRAPPC11	0.483726	5.99316e-13	1.34074e-11
MFSD10	0.483661	6.04159e-13	1.34989e-11
STX6	0.483626	6.0685e-13	1.35421e-11
WBP4	0.483548	6.12817e-13	1.36583e-11
FBXO46	0.483393	6.24734e-13	1.39066e-11
DUSP11	0.483362	6.2716e-13	1.39432e-11
RPL35	0.483323	6.30228e-13	1.39857e-11
RAB35	0.483317	6.30702e-13	1.39857e-11
ZNF346	0.483308	6.31414e-13	1.39857e-11
BCAS2	0.483238	6.36961e-13	1.40911e-11
BBS2	0.483192	6.40635e-13	1.41412e-11
SAR1A	0.48319	6.40805e-13	1.41412e-11
NDUFA2	0.483075	6.50064e-13	1.43278e-11
HNRNPU	0.482948	6.60441e-13	1.45386e-11
CDYL	0.482898	6.64583e-13	1.46119e-11
TRAPPC3	0.482833	6.70035e-13	1.47136e-11
DXO	0.482808	6.72089e-13	1.47406e-11
MTA1	0.482792	6.73441e-13	1.47522e-11
ANKRA2	0.482768	6.75457e-13	1.47783e-11
VPS33A	0.482538	6.95177e-13	1.51912e-11
RITA1	0.482522	6.96544e-13	1.52025e-11
PPCS	0.482402	7.0701e-13	1.54088e-11
NUP37	0.482394	7.07716e-13	1.54088e-11
CDC123	0.482314	7.14779e-13	1.55436e-11
ABI1	0.482162	7.28475e-13	1.58222e-11
ZCCHC10	0.48212	7.32311e-13	1.58863e-11
TRAF6	0.481982	7.44936e-13	1.61109e-11
MED30	0.481982	7.44992e-13	1.61109e-11
TRMT6	0.481978	7.45366e-13	1.61109e-11
PNPO	0.481777	7.64205e-13	1.64907e-11
BRD9	0.481771	7.64781e-13	1.64907e-11
GOLPH3	0.481725	7.69117e-13	1.65643e-11
CCT6A	0.481695	7.72083e-13	1.66081e-11
BRAT1	0.481556	7.85492e-13	1.68763e-11
OPLAH	0.481466	7.9428e-13	1.70446e-11
HSF1	0.481412	7.99656e-13	1.71395e-11
KDSR	0.481211	8.19854e-13	1.75514e-11
PRMT5	0.481155	8.25555e-13	1.76523e-11
UGGT2	0.481046	8.36799e-13	1.78714e-11
COMMD10	0.481001	8.4151e-13	1.79505e-11
IMPA1	0.48097	8.44756e-13	1.79895e-11
ATG5	0.480964	8.45348e-13	1.79895e-11
PEX3	0.480954	8.46392e-13	1.79904e-11
OTUD6B-AS1	0.480902	8.51867e-13	1.80852e-11
PCBD2	0.480881	8.54085e-13	1.81109e-11
AP3M2	0.480774	8.65511e-13	1.83124e-11
VPS37A	0.480773	8.65635e-13	1.83124e-11
CHTOP	0.480628	8.81361e-13	1.8623e-11
SNRPF	0.48057	8.8772e-13	1.87193e-11
KDELR2	0.480567	8.88007e-13	1.87193e-11
YTHDF1	0.480461	8.99755e-13	1.89266e-11
AGPAT1	0.480459	8.99955e-13	1.89266e-11
SRRM1	0.48034	9.1328e-13	1.91842e-11
ARCN1	0.480305	9.17332e-13	1.92456e-11
POLR1E	0.480288	9.1925e-13	1.92456e-11
AGGF1	0.480286	9.19426e-13	1.92456e-11
MTIF3	0.480252	9.23272e-13	1.93035e-11
ZRANB2	0.480191	9.30274e-13	1.94272e-11
ZBTB44	0.480178	9.31773e-13	1.94358e-11
GNB2	0.480085	9.42592e-13	1.96386e-11
WDR20	0.480037	9.48166e-13	1.97318e-11
RPL14	0.480021	9.50052e-13	1.97481e-11
NUP133	0.479949	9.5863e-13	1.98932e-11
PUM3	0.479943	9.59257e-13	1.98932e-11
SETD3	0.479818	9.7427e-13	2.01811e-11
2007-09-01	0.479749	9.8262e-13	2.03306e-11
CASP2	0.479611	9.99437e-13	2.06546e-11
RAC1	0.479593	1.00166e-12	2.06767e-11
ZNF18	0.479546	1.0075e-12	2.07733e-11
HDHD2	0.479438	1.02102e-12	2.10278e-11
MCM3	0.479404	1.02534e-12	2.10925e-11
UHRF1BP1	0.479332	1.0344e-12	2.12544e-11
RER1	0.479254	1.04441e-12	2.14355e-11
ATF2	0.479209	1.05031e-12	2.15319e-11
ASB7	0.479176	1.0546e-12	2.15952e-11
AKAP10	0.479126	1.06104e-12	2.17023e-11
RBL2	0.479102	1.06428e-12	2.17436e-11
DZANK1	0.479069	1.06849e-12	2.18048e-11
MAP2K4	0.479037	1.07276e-12	2.1867e-11
UBOX5	0.47902	1.075e-12	2.18878e-11
CSNK2A1	0.478991	1.07886e-12	2.19414e-11
HEATR6	0.478882	1.0935e-12	2.22139e-11
PTEN	0.478858	1.09666e-12	2.22375e-11
ACOT8	0.478855	1.09715e-12	2.22375e-11
PPRC1	0.478582	1.13455e-12	2.29695e-11
PAIP1	0.47852	1.14324e-12	2.31194e-11
C1orf35	0.478509	1.14487e-12	2.3126e-11
FASTK	0.478464	1.15117e-12	2.32272e-11
STARD3NL	0.478212	1.18747e-12	2.39326e-11
PIGH	0.478141	1.19778e-12	2.41132e-11
GYG1	0.478056	1.21036e-12	2.43305e-11
ZNF839	0.47805	1.21129e-12	2.43305e-11
UBE2H	0.478021	1.21557e-12	2.43891e-11
SNF8	0.478006	1.21783e-12	2.4407e-11
ZNF696	0.477984	1.2212e-12	2.44473e-11
FOXJ3	0.477973	1.22281e-12	2.4452e-11
FER	0.477921	1.23059e-12	2.45802e-11
FRA10AC1	0.477797	1.24948e-12	2.49296e-11
EIF4E2	0.477717	1.2618e-12	2.51475e-11
DHX8	0.477688	1.2664e-12	2.51999e-11
SLAIN2	0.477682	1.26725e-12	2.51999e-11
BCL7B	0.477473	1.30014e-12	2.58252e-11
MKKS	0.477367	1.31718e-12	2.61348e-11
DTX2P1-UPK3BP1-PMS2P11	0.477325	1.324e-12	2.62409e-11
SACM1L	0.477296	1.3287e-12	2.6305e-11
C1orf56	0.47727	1.33289e-12	2.63588e-11
FTSJ3	0.477135	1.35512e-12	2.67689e-11
STX18	0.47678	1.41531e-12	2.79269e-11
EIF3H	0.476743	1.42176e-12	2.80233e-11
LSM8	0.47653	1.45934e-12	2.87324e-11
UBAP2L	0.476477	1.46882e-12	2.88873e-11
ARPC3	0.476426	1.47794e-12	2.90347e-11
MRPL42	0.476289	1.50292e-12	2.94932e-11
SREK1	0.476272	1.50596e-12	2.95204e-11
PPP1CC	0.476243	1.51127e-12	2.95922e-11
ZSCAN21	0.476167	1.52551e-12	2.98384e-11
PRKAB2	0.476092	1.53951e-12	3.00794e-11
SCMH1	0.476019	1.55323e-12	3.03026e-11
HEATR5A	0.476013	1.55433e-12	3.03026e-11
NHP2	0.47596	1.56456e-12	3.0469e-11
CYHR1	0.475894	1.57705e-12	3.06787e-11
C1orf174	0.475821	1.59132e-12	3.09227e-11
GPAA1	0.475648	1.62523e-12	3.15474e-11
SS18L1	0.475491	1.65652e-12	3.21151e-11
OS9	0.475483	1.65806e-12	3.21151e-11
PARP4	0.475422	1.67061e-12	3.23222e-11
ALS2CL	0.475413	1.67237e-12	3.23222e-11
GGA3	0.475319	1.6917e-12	3.26606e-11
SMIM14	0.475295	1.69657e-12	3.27193e-11
COX6A1	0.475189	1.71852e-12	3.3107e-11
IFT52	0.475086	1.74022e-12	3.34888e-11
ACTR10	0.474975	1.76398e-12	3.39096e-11
MGAT2	0.474814	1.79881e-12	3.45422e-11
SNX14	0.47472	1.81937e-12	3.48996e-11
ZNF451	0.474639	1.83752e-12	3.521e-11
XRCC1	0.474575	1.85183e-12	3.54462e-11
PPWD1	0.474522	1.86387e-12	3.56385e-11
TMEM33	0.474509	1.86663e-12	3.56533e-11
CTNNBL1	0.474439	1.88259e-12	3.59198e-11
GFM1	0.474412	1.8889e-12	3.60017e-11
PHF10	0.474355	1.90185e-12	3.62101e-11
WDR75	0.474214	1.93477e-12	3.67976e-11
SNAP29	0.474163	1.94681e-12	3.69873e-11
TXNL4A	0.474099	1.96191e-12	3.72348e-11
IARS	0.474056	1.97223e-12	3.73908e-11
TTC4	0.473921	2.00485e-12	3.79691e-11
TSPYL1	0.47388	2.01477e-12	3.81166e-11
MAU2	0.473711	2.05634e-12	3.8862e-11
ZNF180	0.473566	2.09287e-12	3.95107e-11
CHCHD1	0.473555	2.09573e-12	3.95229e-11
VPS50	0.473491	2.11199e-12	3.97877e-11
PCM1	0.473468	2.11792e-12	3.98575e-11
MRPS33	0.473426	2.12852e-12	4.00149e-11
PIAS3	0.473408	2.1333e-12	4.00626e-11
XRN2	0.473376	2.14157e-12	4.01758e-11
TRAPPC9	0.473351	2.14791e-12	4.02525e-11
SIGMAR1	0.473264	2.17083e-12	4.06394e-11
CAB39L	0.47322	2.18231e-12	4.08116e-11
GTPBP4	0.473193	2.18949e-12	4.09033e-11
NOL10	0.473164	2.19721e-12	4.10046e-11
LSM12	0.473139	2.20375e-12	4.10838e-11
UTP23	0.473103	2.21332e-12	4.12193e-11
PPP6C	0.473042	2.22969e-12	4.1481e-11
EEF1D	0.472957	2.2528e-12	4.18674e-11
TMEM60	0.472803	2.29516e-12	4.25824e-11
BOD1	0.4728	2.29603e-12	4.25824e-11
CTNNA1	0.472716	2.31947e-12	4.29726e-11
HSPA14	0.472704	2.32265e-12	4.2987e-11
CCDC91	0.472626	2.34458e-12	4.3348e-11
PSMC6	0.47257	2.36046e-12	4.35611e-11
FIP1L1	0.472569	2.36097e-12	4.35611e-11
BRK1	0.472552	2.36585e-12	4.35822e-11
ZC3H3	0.472548	2.36698e-12	4.35822e-11
PIGB	0.472447	2.39597e-12	4.40707e-11
MAVS	0.472409	2.40699e-12	4.42278e-11
HMCES	0.472329	2.43009e-12	4.46065e-11
AZIN1	0.472298	2.43916e-12	4.47272e-11
EFTUD2	0.472274	2.44628e-12	4.48117e-11
C5orf34	0.472105	2.49671e-12	4.56729e-11
NOL11	0.472099	2.4984e-12	4.56729e-11
NT5DC1	0.47207	2.50713e-12	4.57858e-11
PSMG2	0.472056	2.51142e-12	4.58173e-11
NUBPL	0.47197	2.5377e-12	4.62498e-11
MAEA	0.471915	2.55465e-12	4.65112e-11
DCLRE1C	0.471884	2.56395e-12	4.66332e-11
C6orf136	0.471825	2.58246e-12	4.68769e-11
CINP	0.471824	2.58259e-12	4.68769e-11
DHX37	0.471739	2.60929e-12	4.73135e-11
SNAPIN	0.47171	2.61824e-12	4.74277e-11
EBPL	0.47165	2.63723e-12	4.77234e-11
DCAF1	0.471493	2.6875e-12	4.8584e-11
ILF2	0.471484	2.69052e-12	4.85895e-11
ZNF566	0.471406	2.71586e-12	4.89977e-11
ALKBH6	0.471346	2.73559e-12	4.92794e-11
RBMXL1	0.471342	2.73698e-12	4.92794e-11
DNM1L	0.471286	2.75532e-12	4.95598e-11
PRKDC	0.471183	2.78947e-12	5.01236e-11
SUDS3	0.471164	2.7959e-12	5.01888e-11
RNF113A	0.471128	2.80827e-12	5.03603e-11
PHYKPL	0.471078	2.8251e-12	5.06115e-11
SPECC1L	0.471051	2.83429e-12	5.07254e-11
UBE2B	0.471007	2.84935e-12	5.09439e-11
SLC10A3	0.470867	2.89744e-12	5.1752e-11
LINC00909	0.470816	2.91528e-12	5.20187e-11
DNAAF5	0.470795	2.92259e-12	5.20971e-11
PRPF38A	0.470783	2.92685e-12	5.21143e-11
H2AFV	0.470776	2.92937e-12	5.21143e-11
TANGO2	0.470687	2.96092e-12	5.25529e-11
MFF	0.470682	2.96255e-12	5.25529e-11
SPATA6	0.470681	2.96284e-12	5.25529e-11
NAA38	0.470631	2.98054e-12	5.28147e-11
ZCCHC7	0.470563	3.00506e-12	5.31964e-11
ZNF277	0.47043	3.05344e-12	5.39994e-11
RBM27	0.470366	3.07679e-12	5.43488e-11
TTC37	0.47036	3.07927e-12	5.43488e-11
ZNF271P	0.470333	3.08919e-12	5.44703e-11
MRPL27	0.470314	3.09623e-12	5.4499e-11
EMB	0.470302	3.1007e-12	5.4499e-11
LMTK2	0.470296	3.10281e-12	5.4499e-11
ZNF343	0.470295	3.10301e-12	5.4499e-11
TBC1D13	0.470263	3.11513e-12	5.46583e-11
RFT1	0.470235	3.12565e-12	5.47732e-11
GNL2	0.470229	3.1278e-12	5.47732e-11
UBR5	0.470221	3.13092e-12	5.47743e-11
CCNH	0.470194	3.14095e-12	5.4896e-11
AAR2	0.470065	3.18968e-12	5.56541e-11
ZCCHC17	0.470063	3.19054e-12	5.56541e-11
DNAJC30	0.470026	3.20475e-12	5.58476e-11
FLAD1	0.470002	3.21403e-12	5.59063e-11
PURA	0.470001	3.21437e-12	5.59063e-11
PPM1A	0.469922	3.24503e-12	5.63848e-11
FBXL3	0.469907	3.25089e-12	5.64317e-11
MLYCD	0.469827	3.28187e-12	5.69143e-11
DDX54	0.469536	3.39804e-12	5.88719e-11
CYP2R1	0.469503	3.41157e-12	5.90493e-11
EIF3K	0.469369	3.46664e-12	5.99444e-11
SOCS6	0.46924	3.52026e-12	6.08128e-11
URGCP	0.469223	3.52767e-12	6.08821e-11
MPHOSPH9	0.469014	3.61667e-12	6.23579e-11
DYNC1LI2	0.468987	3.62827e-12	6.24977e-11
SIK3	0.468886	3.67234e-12	6.3196e-11
RSF1	0.46887	3.67922e-12	6.32535e-11
DCTN3	0.468752	3.73138e-12	6.40888e-11
PCBP2	0.46867	3.76822e-12	6.46595e-11
ST13	0.468662	3.7719e-12	6.46606e-11
ENTPD4	0.468649	3.77772e-12	6.46985e-11
GDAP2	0.468635	3.78385e-12	6.47414e-11
ERH	0.468612	3.79444e-12	6.48556e-11
CDC42SE2	0.468604	3.79777e-12	6.48556e-11
BCKDHB	0.468473	3.8575e-12	6.58128e-11
CDC26	0.468404	3.88942e-12	6.62943e-11
FNBP1L	0.468364	3.90776e-12	6.65435e-11
ZNF252P	0.468336	3.92093e-12	6.67043e-11
ETF1	0.468325	3.92636e-12	6.67333e-11
CMTR1	0.468132	4.01736e-12	6.82152e-11
CDV3	0.468052	4.05595e-12	6.87439e-11
SH3GLB1	0.468051	4.05618e-12	6.87439e-11
ZNF622	0.468034	4.0645e-12	6.88196e-11
CTR9	0.467979	4.09126e-12	6.92072e-11
DYRK2	0.467908	4.12573e-12	6.97245e-11
GOLT1B	0.467701	4.2286e-12	7.13955e-11
ZNF397	0.467639	4.25968e-12	7.18524e-11
MRPL22	0.467613	4.27314e-12	7.20117e-11
ATAD2	0.467549	4.30572e-12	7.24924e-11
BIRC2	0.467531	4.31471e-12	7.25755e-11
MBD4	0.467512	4.32445e-12	7.2671e-11
NIF3L1	0.467382	4.39151e-12	7.37287e-11
VPS45	0.467309	4.42984e-12	7.43025e-11
RWDD1	0.467226	4.47368e-12	7.49676e-11
MECP2	0.467103	4.53973e-12	7.60034e-11
CLCC1	0.46703	4.57919e-12	7.65923e-11
MARK3	0.467021	4.58363e-12	7.6595e-11
NUDCD1	0.466962	4.61611e-12	7.70658e-11
AGFG1	0.466911	4.64413e-12	7.74612e-11
HSF2	0.4669	4.64989e-12	7.74851e-11
PLOD3	0.466764	4.72554e-12	7.86725e-11
GTF2F1	0.466718	4.7514e-12	7.90295e-11
CHP1	0.466666	4.78061e-12	7.94415e-11
CACUL1	0.466512	4.86855e-12	8.08279e-11
CNOT8	0.466474	4.89035e-12	8.11145e-11
ARL14EP	0.466349	4.96353e-12	8.22521e-11
MRPL58	0.46631	4.98665e-12	8.25588e-11
ZNF12	0.466272	5.00905e-12	8.2853e-11
RAB18	0.466252	5.02091e-12	8.29726e-11
GINS4	0.466197	5.05363e-12	8.34362e-11
LEMD2	0.466021	5.15968e-12	8.50484e-11
OXGR1	0.466019	5.16078e-12	8.50484e-11
TADA1	0.465986	5.18106e-12	8.5304e-11
VOPP1	0.465975	5.18751e-12	8.53317e-11
THAP12	0.465925	5.21824e-12	8.57583e-11
MNAT1	0.46576	5.32108e-12	8.73682e-11
ZNF292	0.465748	5.32859e-12	8.74114e-11
RUFY2	0.465739	5.33452e-12	8.74286e-11
DCAF11	0.465664	5.38157e-12	8.8105e-11
RIOK1	0.465658	5.38564e-12	8.8105e-11
WSB2	0.465621	5.40894e-12	8.84053e-11
SRSF8	0.4656	5.42288e-12	8.85522e-11
RSBN1L	0.465535	5.4643e-12	8.91473e-11
PROSER1	0.46546	5.51286e-12	8.98575e-11
ACAD9	0.465411	5.54511e-12	9.02654e-11
NDUFAF2	0.465406	5.54797e-12	9.02654e-11
IPO5	0.465088	5.76008e-12	9.36314e-11
LSG1	0.465054	5.78303e-12	9.39191e-11
NT5C3B	0.464989	5.82774e-12	9.44807e-11
GID8	0.464988	5.82816e-12	9.44807e-11
STAG2	0.464909	5.88231e-12	9.52721e-11
SFXN4	0.464897	5.89064e-12	9.53208e-11
SRSF5	0.464888	5.89719e-12	9.53406e-11
PJA2	0.464828	5.93879e-12	9.59265e-11
TMUB1	0.464771	5.97864e-12	9.6483e-11
CDC73	0.464689	6.0372e-12	9.73403e-11
TMEM135	0.464503	6.17004e-12	9.93926e-11
ECH1	0.464387	6.25475e-12	1.00667e-10
CIPC	0.464372	6.26592e-12	1.00756e-10
NARS2	0.464185	6.40523e-12	1.02903e-10
ARHGEF3	0.464086	6.48027e-12	1.04016e-10
INTS10	0.463983	6.55891e-12	1.05184e-10
FAM120B	0.463928	6.60161e-12	1.0574e-10
BCL9	0.463923	6.60543e-12	1.0574e-10
RPS25	0.463852	6.66087e-12	1.06532e-10
CLNS1A	0.463733	6.75441e-12	1.07841e-10
NUP153	0.463732	6.75474e-12	1.07841e-10
PRPF38B	0.463571	6.88408e-12	1.09808e-10
SS18L2	0.463431	6.99723e-12	1.11513e-10
AASDHPPT	0.463329	7.08151e-12	1.12756e-10
ZSCAN25	0.463264	7.13603e-12	1.13523e-10
IDE	0.463207	7.18343e-12	1.14176e-10
CAMLG	0.462997	7.3626e-12	1.1692e-10
GRWD1	0.46285	7.48961e-12	1.18831e-10
SNTB1	0.462818	7.51814e-12	1.19178e-10
PRR3	0.462804	7.53032e-12	1.19262e-10
BLOC1S6	0.462797	7.53676e-12	1.19262e-10
PRPSAP1	0.462672	7.6471e-12	1.20901e-10
HIKESHI	0.462631	7.68462e-12	1.21359e-10
TFPT	0.462625	7.68964e-12	1.21359e-10
EIF2B2	0.462559	7.7495e-12	1.22196e-10
MPHOSPH8	0.462362	7.92962e-12	1.24926e-10
PINX1	0.462201	8.07982e-12	1.27181e-10
KIAA0319L	0.462178	8.10158e-12	1.27411e-10
CBX1	0.462154	8.12419e-12	1.27655e-10
EED	0.461986	8.28506e-12	1.30068e-10
TRIM32	0.461899	8.3695e-12	1.31155e-10
MRPL32	0.461896	8.37279e-12	1.31155e-10
EDC4	0.461892	8.37627e-12	1.31155e-10
TIMM8B	0.461728	8.5379e-12	1.33569e-10
DIS3	0.461701	8.56525e-12	1.3388e-10
POMP	0.461679	8.58699e-12	1.34034e-10
KDM3B	0.461676	8.59012e-12	1.34034e-10
PLPP6	0.461635	8.63092e-12	1.34554e-10
CSE1L	0.461591	8.67532e-12	1.35128e-10
RNF214	0.461544	8.72265e-12	1.35747e-10
HMOX2	0.461507	8.76032e-12	1.36215e-10
LAPTM4B	0.461414	8.85636e-12	1.37589e-10
ARHGAP39	0.461315	8.95839e-12	1.39053e-10
IL6ST	0.461126	9.1576e-12	1.42022e-10
ZNF780A	0.461108	9.17635e-12	1.4219e-10
POLR1A	0.461025	9.26633e-12	1.4346e-10
DCAF10	0.460921	9.37824e-12	1.45067e-10
TTI1	0.460855	9.45058e-12	1.4606e-10
NAPEPLD	0.460846	9.46018e-12	1.46082e-10
FBXO3	0.460829	9.47954e-12	1.46255e-10
BTRC	0.460816	9.4936e-12	1.46302e-10
STAG1	0.460811	9.49898e-12	1.46302e-10
ZNF507	0.46076	9.55599e-12	1.47054e-10
NEDD8	0.460723	9.59701e-12	1.47454e-10
CDC40	0.460721	9.59846e-12	1.47454e-10
TPD52	0.460555	9.78526e-12	1.50195e-10
POLDIP3	0.460501	9.84683e-12	1.5101e-10
NARS	0.460432	9.92684e-12	1.52107e-10
FUT10	0.460368	9.99997e-12	1.53096e-10
TMEM267	0.460156	1.0249e-11	1.56774e-10
PPP3CB	0.46013	1.02807e-11	1.5711e-10
MAP3K1	0.460123	1.02885e-11	1.5711e-10
TMX3	0.459968	1.04748e-11	1.59819e-10
PPP1R7	0.45994	1.05086e-11	1.60198e-10
HMBS	0.45978	1.07051e-11	1.63055e-10
METTL8	0.459759	1.0731e-11	1.6331e-10
MTHFD1	0.459737	1.07588e-11	1.63595e-10
ZNF576	0.459681	1.08286e-11	1.64389e-10
SLC39A9	0.459681	1.08294e-11	1.64389e-10
RPS29	0.459663	1.08512e-11	1.6458e-10
DUSP12	0.459529	1.10205e-11	1.67006e-10
PDE7A	0.459337	1.12683e-11	1.70617e-10
MTPAP	0.459324	1.12855e-11	1.70732e-10
RSRC1	0.45931	1.13042e-11	1.70872e-10
ZDHHC21	0.459271	1.13547e-11	1.7149e-10
CUTC	0.459242	1.13928e-11	1.7192e-10
PAM	0.459222	1.14188e-11	1.72063e-10
TM2D3	0.45922	1.14215e-11	1.72063e-10
HMGXB3	0.459127	1.15454e-11	1.73783e-10
SSB	0.459075	1.16147e-11	1.74616e-10
UBE2D4	0.459071	1.16202e-11	1.74616e-10
PTPN2	0.458964	1.1765e-11	1.76643e-10
HTATSF1	0.458891	1.18645e-11	1.7785e-10
METTL23	0.45889	1.18653e-11	1.7785e-10
SMAP1	0.458795	1.19961e-11	1.7966e-10
IPP	0.458756	1.20501e-11	1.80319e-10
PREB	0.458674	1.21647e-11	1.81882e-10
RFC5	0.458636	1.22188e-11	1.82537e-10
TSG101	0.458602	1.22672e-11	1.83108e-10
CAMSAP2	0.458517	1.23878e-11	1.84753e-10
NMT1	0.458466	1.24611e-11	1.85692e-10
GPATCH4	0.45845	1.24832e-11	1.85867e-10
DYRK4	0.458371	1.25973e-11	1.87409e-10
IMMP1L	0.458307	1.26908e-11	1.88644e-10
ZNF354A	0.4582	1.28485e-11	1.90549e-10
BAIAP2L1	0.4582	1.28489e-11	1.90549e-10
ALKBH1	0.458192	1.28601e-11	1.90549e-10
IARS2	0.458187	1.2867e-11	1.90549e-10
PCNP	0.458184	1.28722e-11	1.90549e-10
PEX10	0.458122	1.29636e-11	1.91743e-10
THOC1	0.458107	1.29866e-11	1.91924e-10
ERP29	0.4581	1.29974e-11	1.91927e-10
GAK	0.458059	1.30583e-11	1.92666e-10
BRAP	0.457996	1.31531e-11	1.93906e-10
RBX1	0.457841	1.33906e-11	1.97244e-10
TMEM167B	0.457746	1.35377e-11	1.99247e-10
FBXO28	0.457712	1.35902e-11	1.99855e-10
GSS	0.457678	1.3643e-11	2.00467e-10
PLCG1	0.457654	1.36807e-11	2.00857e-10
RWDD2A	0.457543	1.38564e-11	2.03269e-10
GPBP1L1	0.45752	1.38945e-11	2.0366e-10
CMAS	0.457469	1.39754e-11	2.0468e-10
MAP7	0.457409	1.40722e-11	2.05928e-10
TSFM	0.457398	1.40903e-11	2.06025e-10
FAM204A	0.457362	1.4148e-11	2.06699e-10
GOPC	0.457332	1.41972e-11	2.07249e-10
FMR1	0.457298	1.42529e-11	2.07892e-10
SMIM20	0.457028	1.47006e-11	2.14248e-10
PWP1	0.456991	1.47643e-11	2.15002e-10
UROS	0.456849	1.50058e-11	2.18341e-10
UBE2J2	0.456723	1.52254e-11	2.21355e-10
IQCE	0.456647	1.5358e-11	2.23023e-10
INTS9	0.456643	1.5365e-11	2.23023e-10
ZNF93	0.45663	1.53874e-11	2.23133e-10
WIPF2	0.456625	1.53975e-11	2.23133e-10
RYBP	0.456567	1.54986e-11	2.24416e-10
MTFR1L	0.456553	1.55239e-11	2.24601e-10
UPF2	0.456537	1.55533e-11	2.24844e-10
RPUSD4	0.456526	1.55726e-11	2.24942e-10
MCM7	0.456515	1.55928e-11	2.25051e-10
TMEM65	0.45644	1.57264e-11	2.26798e-10
MAPKAPK3	0.456313	1.59564e-11	2.29928e-10
BCL2L2	0.45629	1.59992e-11	2.3036e-10
COA1	0.45623	1.61091e-11	2.31757e-10
VCP	0.456158	1.62432e-11	2.33498e-10
C5orf63	0.456146	1.62643e-11	2.33614e-10
PIBF1	0.456052	1.64404e-11	2.35953e-10
ERBIN	0.456016	1.65093e-11	2.36752e-10
ARL6IP4	0.455985	1.65668e-11	2.37387e-10
CTDP1	0.455834	1.68552e-11	2.41326e-10
GATAD2A	0.45574	1.70367e-11	2.4373e-10
ZNF106	0.455669	1.71755e-11	2.45519e-10
NUP85	0.455588	1.73367e-11	2.47625e-10
ACBD6	0.455469	1.75736e-11	2.50676e-10
LTBR	0.455466	1.75783e-11	2.50676e-10
PTPN12	0.455431	1.76488e-11	2.51482e-10
SIVA1	0.455403	1.77063e-11	2.52099e-10
RAN	0.455368	1.77774e-11	2.52911e-10
TAF5L	0.455309	1.78962e-11	2.544e-10
RNF4	0.45505	1.84345e-11	2.61843e-10
C6orf62	0.454986	1.85681e-11	2.63531e-10
DDX49	0.454879	1.87956e-11	2.66549e-10
FANCF	0.454795	1.89776e-11	2.68916e-10
OPA3	0.454735	1.91068e-11	2.70404e-10
PANX1	0.454732	1.91128e-11	2.70404e-10
MAP2K5	0.45469	1.9206e-11	2.71508e-10
ADD1	0.454671	1.92459e-11	2.71858e-10
WIPI2	0.454541	1.95342e-11	2.75712e-10
RPS23	0.454526	1.95683e-11	2.75976e-10
RARS2	0.454382	1.98913e-11	2.8031e-10
TMEM14B	0.454298	2.00815e-11	2.82768e-10
VDAC2	0.454216	2.02695e-11	2.85191e-10
TUFT1	0.454185	2.03412e-11	2.85975e-10
FIS1	0.454163	2.03919e-11	2.86463e-10
WDR12	0.454134	2.04586e-11	2.87175e-10
RNF26	0.454087	2.0569e-11	2.88498e-10
RNF14	0.454064	2.06219e-11	2.89014e-10
ATXN10	0.454046	2.06662e-11	2.89215e-10
MRPS21	0.45404	2.06786e-11	2.89215e-10
GSTZ1	0.454038	2.06848e-11	2.89215e-10
ERLIN2	0.453924	2.09528e-11	2.92734e-10
ELP3	0.453907	2.09935e-11	2.93073e-10
SARS2	0.453891	2.10326e-11	2.9339e-10
NSUN5	0.453857	2.11135e-11	2.94289e-10
MEAF6	0.453731	2.1417e-11	2.98288e-10
RNASEH2B	0.453702	2.14874e-11	2.99036e-10
ZSWIM3	0.453685	2.15291e-11	2.99383e-10
PDRG1	0.453668	2.15721e-11	2.99748e-10
PTPMT1	0.453658	2.15954e-11	2.9984e-10
ANAPC4	0.453487	2.20184e-11	3.05476e-10
BTBD6	0.4534	2.22383e-11	3.08287e-10
LONRF1	0.453337	2.23971e-11	3.10249e-10
C10orf88	0.453274	2.25574e-11	3.12228e-10
CCDC127	0.453089	2.30356e-11	3.186e-10
PI4KA	0.453058	2.31164e-11	3.19417e-10
SEPHS1	0.453053	2.31304e-11	3.19417e-10
SBNO1	0.452841	2.36924e-11	3.26926e-10
POM121	0.452833	2.3714e-11	3.26972e-10
GTPBP2	0.452819	2.37508e-11	3.27227e-10
WDR48	0.452811	2.37731e-11	3.27283e-10
AKAP11	0.452783	2.38485e-11	3.28069e-10
TMEM11	0.452737	2.39721e-11	3.29515e-10
SPOPL	0.452631	2.42623e-11	3.33248e-10
COMMD5	0.452479	2.46823e-11	3.38757e-10
BBIP1	0.452437	2.47985e-11	3.4009e-10
UBE2Q1	0.45239	2.49311e-11	3.41648e-10
SEC23IP	0.452272	2.52661e-11	3.45974e-10
LOC101927151	0.45222	2.5415e-11	3.47746e-10
HMG20A	0.452185	2.55143e-11	3.48839e-10
TUBGCP2	0.452172	2.55522e-11	3.4909e-10
METTL5	0.452103	2.57519e-11	3.51549e-10
FBXL4	0.452083	2.58102e-11	3.51881e-10
TPP2	0.452081	2.58155e-11	3.51881e-10
NUDCD2	0.452055	2.58935e-11	3.52675e-10
PGGT1B	0.45204	2.59373e-11	3.53004e-10
NOC4L	0.45196	2.61731e-11	3.55936e-10
FZD6	0.451953	2.61925e-11	3.55936e-10
YWHAZ	0.451878	2.64163e-11	3.58704e-10
UBE2R2	0.451713	2.69115e-11	3.65152e-10
POP5	0.451661	2.70701e-11	3.66959e-10
RMDN1	0.451656	2.70857e-11	3.66959e-10
HSBP1	0.451549	2.7413e-11	3.71112e-10
TFDP2	0.451493	2.7588e-11	3.73199e-10
OTUD7B	0.451357	2.80124e-11	3.78654e-10
AP1G1	0.451333	2.80901e-11	3.79418e-10
NDUFB1	0.451312	2.81557e-11	3.80017e-10
MLH3	0.451283	2.82471e-11	3.80963e-10
CAAP1	0.451193	2.85349e-11	3.84556e-10
FBXO9	0.451012	2.91215e-11	3.92165e-10
IDI1	0.450971	2.92563e-11	3.93643e-10
MSH3	0.450966	2.92752e-11	3.93643e-10
KIAA0586	0.450903	2.94823e-11	3.95983e-10
LRRC8D	0.4509	2.94935e-11	3.95983e-10
LOC100506282	0.450818	2.97661e-11	3.99343e-10
NIPAL3	0.450761	2.99573e-11	4.01607e-10
NAA60	0.450743	3.00171e-11	4.02108e-10
TFG	0.450711	3.01259e-11	4.03264e-10
PTBP2	0.450648	3.03395e-11	4.0582e-10
PMF1	0.450581	3.05693e-11	4.08588e-10
HLTF	0.450545	3.06936e-11	4.09943e-10
PRPF8	0.450525	3.07623e-11	4.1037e-10
ELMO2	0.450522	3.07715e-11	4.1037e-10
NDUFB4	0.450434	3.10793e-11	4.14168e-10
G3BP1	0.450343	3.13976e-11	4.18097e-10
WWP1	0.450331	3.14379e-11	4.18322e-10
COMMD2	0.4502	3.19036e-11	4.24204e-10
SIAH1	0.450109	3.22331e-11	4.28268e-10
LARS	0.450074	3.23577e-11	4.29604e-10
NAXD	0.450042	3.24772e-11	4.30871e-10
ZNF623	0.45001	3.25942e-11	4.32102e-10
DSTYK	0.449973	3.27267e-11	4.33538e-10
FDPS	0.449957	3.27882e-11	4.34031e-10
IMMT	0.449908	3.29682e-11	4.36091e-10
GUF1	0.449865	3.31251e-11	4.37843e-10
UFSP1	0.449743	3.35822e-11	4.43558e-10
TIGD5	0.449612	3.40795e-11	4.49794e-10
POP1	0.449528	3.4401e-11	4.53703e-10
DNAJB12	0.449502	3.45026e-11	4.54707e-10
GPN3	0.449462	3.46565e-11	4.564e-10
EBAG9	0.449361	3.50524e-11	4.61275e-10
ADAM17	0.449326	3.51872e-11	4.62707e-10
SUB1	0.449307	3.52621e-11	4.63353e-10
NME3	0.449298	3.5297e-11	4.6347e-10
DNAJC15	0.449251	3.54861e-11	4.65612e-10
RERE	0.449193	3.57158e-11	4.68282e-10
ATXN7L3	0.449128	3.59751e-11	4.71337e-10
CFL2	0.449027	3.6384e-11	4.76261e-10
CMTR2	0.449022	3.64042e-11	4.76261e-10
UBE3A	0.448994	3.65181e-11	4.77099e-10
LAMTOR4	0.448994	3.65215e-11	4.77099e-10
LDLRAP1	0.448907	3.68765e-11	4.81385e-10
SUPT3H	0.448856	3.7088e-11	4.83793e-10
RPS6KC1	0.448774	3.7428e-11	4.87873e-10
UBE2A	0.448767	3.74577e-11	4.8788e-10
SLC4A1AP	0.448757	3.75004e-11	4.8788e-10
MRPS18B	0.448754	3.75103e-11	4.8788e-10
ANKMY2	0.448747	3.75395e-11	4.87904e-10
PBX2	0.448684	3.78045e-11	4.90734e-10
E2F3	0.448683	3.7812e-11	4.90734e-10
MEGF8	0.448663	3.78971e-11	4.91482e-10
RPP30	0.448627	3.80468e-11	4.93066e-10
TTC19	0.448449	3.88133e-11	5.02635e-10
MPDU1	0.448412	3.8974e-11	5.04351e-10
PRPSAP2	0.448385	3.90893e-11	5.05478e-10
NOB1	0.448352	3.92354e-11	5.07001e-10
CDK19	0.448288	3.95137e-11	5.10228e-10
UQCR10	0.448275	3.95713e-11	5.10603e-10
DNAJC13	0.448256	3.96574e-11	5.11346e-10
TNFRSF1A	0.448202	3.98971e-11	5.14067e-10
SART3	0.448192	3.99402e-11	5.14252e-10
NUS1	0.448165	4.00613e-11	5.1544e-10
SLC35E3	0.448018	4.07205e-11	5.23545e-10
ZNF688	0.447968	4.09486e-11	5.261e-10
NUP88	0.447926	4.1141e-11	5.28192e-10
FXN	0.447839	4.15433e-11	5.32975e-10
RSRP1	0.447575	4.27798e-11	5.48446e-10
C7orf26	0.447534	4.29754e-11	5.50559e-10
EIF3G	0.447505	4.31162e-11	5.51967e-10
WDR59	0.447383	4.37031e-11	5.59081e-10
PDHX	0.447342	4.39066e-11	5.61284e-10
TMEM14C	0.447317	4.40253e-11	5.62398e-10
RBM23	0.447248	4.43684e-11	5.66377e-10
GORASP2	0.447223	4.44891e-11	5.67514e-10
ANAPC5	0.447207	4.45664e-11	5.68095e-10
OSBPL2	0.447177	4.47185e-11	5.69628e-10
ARHGAP21	0.447152	4.48431e-11	5.70489e-10
GLRX5	0.447144	4.48801e-11	5.70489e-10
PPIL2	0.447144	4.48817e-11	5.70489e-10
MRPS30	0.446971	4.57539e-11	5.81162e-10
CAND1	0.44695	4.58586e-11	5.82079e-10
TTPAL	0.446861	4.63136e-11	5.87437e-10
CGGBP1	0.446809	4.65838e-11	5.90446e-10
TEAD4	0.44679	4.66789e-11	5.91233e-10
NDUFAF1	0.446764	4.68148e-11	5.92535e-10
RBFA	0.446732	4.69817e-11	5.94227e-10
DDX19A	0.446614	4.76041e-11	6.01674e-10
COQ6	0.446443	4.85111e-11	6.12705e-10
PIK3CB	0.446302	4.92753e-11	6.21918e-10
MLEC	0.446219	4.97314e-11	6.27233e-10
USP7	0.446048	5.06832e-11	6.38786e-10
MFAP1	0.446024	5.08172e-11	6.40025e-10
CEP350	0.445977	5.1084e-11	6.42932e-10
SLC25A32	0.445947	5.12555e-11	6.44638e-10
GEMIN2	0.445773	5.22487e-11	6.56667e-10
ZNF442	0.445749	5.23866e-11	6.57939e-10
LMBR1	0.445717	5.25718e-11	6.59802e-10
ADIPOR1	0.445707	5.26301e-11	6.60071e-10
PACSIN2	0.445683	5.27714e-11	6.61379e-10
ANP32B	0.445677	5.28086e-11	6.61383e-10
HIGD2A	0.445661	5.28992e-11	6.62053e-10
USP33	0.44563	5.30835e-11	6.63897e-10
SCAF8	0.445273	5.52171e-11	6.90098e-10
RBM8A	0.445167	5.58681e-11	6.97747e-10
CFDP1	0.445144	5.60126e-11	6.99064e-10
RBM12B	0.445089	5.63494e-11	7.02777e-10
TFAM	0.44508	5.64087e-11	7.03027e-10
ZNF571	0.445066	5.6495e-11	7.03613e-10
TRMT5	0.44491	5.74783e-11	7.15361e-10
SCYL3	0.444898	5.75512e-11	7.1577e-10
KLHDC3	0.444879	5.76726e-11	7.16782e-10
ZNF706	0.444856	5.78169e-11	7.18077e-10
USP39	0.444822	5.80361e-11	7.203e-10
TNIP2	0.444808	5.81231e-11	7.20879e-10
ATPAF2	0.444787	5.82605e-11	7.22083e-10
SLC9A6	0.444731	5.8619e-11	7.26023e-10
CCNDBP1	0.444666	5.9043e-11	7.3077e-10
GOLPH3L	0.444647	5.91647e-11	7.31767e-10
USP6NL	0.444641	5.92053e-11	7.31767e-10
ZNF257	0.444546	5.98317e-11	7.38998e-10
SLIRP	0.444525	5.99669e-11	7.40156e-10
SLX4IP	0.44449	6.01972e-11	7.42487e-10
CENPQ	0.444484	6.02402e-11	7.42506e-10
PRMT1	0.444385	6.09027e-11	7.50155e-10
WASL	0.444305	6.14385e-11	7.56234e-10
WDR82	0.44428	6.16103e-11	7.57827e-10
AP5M1	0.444217	6.20377e-11	7.62561e-10
YTHDC2	0.444154	6.24688e-11	7.67333e-10
C1orf43	0.444093	6.28907e-11	7.71985e-10
RPS24	0.444086	6.294e-11	7.72061e-10
RAB10	0.444072	6.30324e-11	7.72666e-10
WHAMM	0.444048	6.32033e-11	7.74229e-10
MTMR1	0.443998	6.35494e-11	7.77937e-10
IMPACT	0.443812	6.48661e-11	7.93512e-10
NDUFA10	0.4437	6.56656e-11	8.02744e-10
ZNF317	0.443672	6.58679e-11	8.04668e-10
SNX17	0.443655	6.59924e-11	8.05639e-10
YKT6	0.443563	6.66623e-11	8.13261e-10
BNIP1	0.443432	6.76272e-11	8.24229e-10
BRD1	0.443429	6.76533e-11	8.24229e-10
TULP3	0.443405	6.78302e-11	8.25822e-10
PIGG	0.443372	6.80745e-11	8.27736e-10
EIF3B	0.443371	6.808e-11	8.27736e-10
ETFDH	0.44335	6.82395e-11	8.29112e-10
RECQL4	0.443272	6.88235e-11	8.35149e-10
AKT1	0.443271	6.88297e-11	8.35149e-10
MRPL43	0.443229	6.91502e-11	8.38469e-10
MRPL10	0.443088	7.02306e-11	8.50164e-10
MAP4K5	0.443086	7.0243e-11	8.50164e-10
ATP6V1A	0.443084	7.02572e-11	8.50164e-10
KDM1B	0.442993	7.09651e-11	8.58151e-10
TRIP6	0.442922	7.15168e-11	8.63825e-10
RNF169	0.44292	7.15309e-11	8.63825e-10
TDG	0.442893	7.1744e-11	8.65814e-10
WAPL	0.442868	7.19408e-11	8.67605e-10
PARP2	0.442693	7.33385e-11	8.83865e-10
TMED4	0.442677	7.34604e-11	8.84242e-10
HINT1	0.442671	7.35117e-11	8.84242e-10
MFSD14A	0.44267	7.35181e-11	8.84242e-10
CUL7	0.442651	7.36696e-11	8.85469e-10
TOMM70	0.442636	7.37962e-11	8.86396e-10
RAB24	0.442589	7.41731e-11	8.8999e-10
ZNF148	0.442587	7.41948e-11	8.8999e-10
TMEM248	0.442522	7.47252e-11	8.95752e-10
MPP5	0.442404	7.56891e-11	9.06699e-10
TIMM9	0.442334	7.62724e-11	9.13075e-10
LPAR2	0.442321	7.63863e-11	9.13827e-10
FKBP4	0.442303	7.65365e-11	9.15013e-10
SURF1	0.44221	7.73121e-11	9.23668e-10
TM7SF3	0.442144	7.78732e-11	9.29751e-10
HACD2	0.442126	7.80281e-11	9.30979e-10
NDUFB3	0.442079	7.84291e-11	9.35141e-10
BRI3BP	0.441994	7.91614e-11	9.43243e-10
ING2	0.441895	8.00272e-11	9.52925e-10
KDM5B	0.441845	8.04654e-11	9.57507e-10
KMT2C	0.441831	8.05813e-11	9.58249e-10
GCN1	0.441802	8.0843e-11	9.60722e-10
CPNE3	0.441589	8.27441e-11	9.82662e-10
NRDE2	0.441535	8.32333e-11	9.87816e-10
PGPEP1	0.441289	8.54914e-11	1.01337e-09
TRAPPC2L	0.441284	8.55429e-11	1.01337e-09
ROGDI	0.441282	8.55567e-11	1.01337e-09
RBBP8	0.441154	8.67599e-11	1.02636e-09
ERMP1	0.441153	8.67676e-11	1.02636e-09
SIPA1L1	0.440996	8.82671e-11	1.04341e-09
IPO4	0.440965	8.85678e-11	1.04627e-09
CYB561D1	0.440958	8.86376e-11	1.0464e-09
TWISTNB	0.440926	8.89437e-11	1.04932e-09
SLC25A40	0.440857	8.96155e-11	1.05655e-09
EIF1AD	0.440804	9.0129e-11	1.06191e-09
BPHL	0.44069	9.12629e-11	1.07456e-09
RNPC3	0.440682	9.13422e-11	1.07479e-09
ELL	0.440663	9.1528e-11	1.07627e-09
PPP2CA	0.440639	9.17679e-11	1.07838e-09
CPNE1	0.440616	9.19929e-11	1.08031e-09
BRWD1	0.440443	9.37469e-11	1.10019e-09
SF3B3	0.440378	9.44124e-11	1.10727e-09
ACD	0.440337	9.48294e-11	1.11144e-09
HMGN1	0.440237	9.58657e-11	1.12285e-09
IDH3B	0.4402	9.62543e-11	1.12666e-09
CMSS1	0.440188	9.63754e-11	1.12734e-09
MGRN1	0.440129	9.69999e-11	1.1339e-09
FIGNL1	0.440021	9.81374e-11	1.14645e-09
MAPKAPK5	0.440012	9.82348e-11	1.14684e-09
MLF2	0.439975	9.8634e-11	1.15075e-09
KATNB1	0.439905	9.93808e-11	1.15871e-09
BTBD7	0.439894	9.94997e-11	1.15934e-09
ZNHIT6	0.439883	9.96275e-11	1.16007e-09
KCTD20	0.43979	1.00629e-10	1.17097e-09
COIL	0.439747	1.01105e-10	1.17575e-09
RPL15	0.439715	1.01455e-10	1.17905e-09
SLK	0.43968	1.01839e-10	1.18275e-09
RPAIN	0.439632	1.02368e-10	1.18812e-09
LOC729291	0.43962	1.02502e-10	1.18891e-09
PSMF1	0.439571	1.03054e-10	1.19453e-09
IFRD1	0.439538	1.03422e-10	1.19802e-09
FAF1	0.439499	1.03865e-10	1.2022e-09
PIK3C2A	0.439494	1.03917e-10	1.2022e-09
TSR1	0.439487	1.03991e-10	1.20228e-09
DENND4B	0.439434	1.04589e-10	1.20841e-09
PELO	0.439419	1.04769e-10	1.20971e-09
MORC3	0.439369	1.05335e-10	1.2154e-09
UBE2K	0.439361	1.05429e-10	1.2154e-09
SLC25A21	0.439352	1.05529e-10	1.2154e-09
DHRS7B	0.439351	1.05534e-10	1.2154e-09
PRMT7	0.439245	1.06754e-10	1.22866e-09
ZFYVE1	0.439137	1.08014e-10	1.24168e-09
SNX16	0.439136	1.08024e-10	1.24168e-09
FAM114A2	0.439124	1.0817e-10	1.24218e-09
LINC01128	0.439121	1.08206e-10	1.24218e-09
AVL9	0.439007	1.09541e-10	1.25583e-09
MAML1	0.439003	1.09594e-10	1.25583e-09
SPPL3	0.439002	1.09605e-10	1.25583e-09
RBM26	0.438885	1.11003e-10	1.27103e-09
C8orf82	0.438709	1.13137e-10	1.29464e-09
NCAPD2	0.438565	1.14911e-10	1.3141e-09
RNF44	0.43847	1.16092e-10	1.32676e-09
PTCD2	0.438461	1.16207e-10	1.32722e-09
KPNA4	0.438307	1.18159e-10	1.34811e-09
MPHOSPH10	0.438304	1.18187e-10	1.34811e-09
RPL7L1	0.438225	1.19199e-10	1.35879e-09
ANKRD10	0.438133	1.20393e-10	1.37154e-09
IQCB1	0.438113	1.20647e-10	1.37355e-09
GMFB	0.438041	1.21595e-10	1.38346e-09
KHNYN	0.437964	1.22612e-10	1.39415e-09
PPHLN1	0.437955	1.22733e-10	1.39464e-09
ZNF45	0.437849	1.24142e-10	1.40976e-09
PPIL4	0.437828	1.24413e-10	1.41193e-09
DNAJC11	0.437744	1.25546e-10	1.42389e-09
CBX3	0.437675	1.26491e-10	1.4337e-09
SFT2D2	0.437631	1.27084e-10	1.43951e-09
SUPT16H	0.437616	1.27293e-10	1.44097e-09
SFR1	0.437601	1.27496e-10	1.44234e-09
CIB1	0.437561	1.28055e-10	1.4473e-09
TMCC1	0.437556	1.28119e-10	1.4473e-09
NSUN4	0.437552	1.28177e-10	1.4473e-09
ZNF107	0.437523	1.2857e-10	1.45083e-09
AMN1	0.437344	1.31078e-10	1.47739e-09
PSMB3	0.437343	1.31089e-10	1.47739e-09
AUP1	0.437331	1.31265e-10	1.47845e-09
NPAT	0.437317	1.31457e-10	1.47967e-09
ING4	0.437307	1.31603e-10	1.48039e-09
ZNF493	0.437213	1.32944e-10	1.49454e-09
TRNAU1AP	0.437159	1.33714e-10	1.50225e-09
FAM189B	0.43709	1.34707e-10	1.51245e-09
NOL8	0.437083	1.34807e-10	1.51263e-09
TMEM161B	0.437071	1.34981e-10	1.51363e-09
MRPL48	0.437041	1.35413e-10	1.51753e-09
MRPS16	0.43702	1.35722e-10	1.51912e-09
MRPL16	0.43702	1.35725e-10	1.51912e-09
BCCIP	0.436933	1.37009e-10	1.53253e-09
SLMAP	0.436794	1.3907e-10	1.55461e-09
TMCO6	0.436738	1.39904e-10	1.56296e-09
ZNF230	0.436729	1.40043e-10	1.5634e-09
MSL2	0.436724	1.40118e-10	1.5634e-09
SAT2	0.436695	1.40548e-10	1.56722e-09
TMEM39A	0.436553	1.42708e-10	1.59032e-09
IFRD2	0.436535	1.4299e-10	1.59247e-09
GUCD1	0.43643	1.44609e-10	1.6095e-09
CDK5RAP1	0.436412	1.44886e-10	1.61158e-09
SRRD	0.43638	1.45385e-10	1.61612e-09
UBE2L3	0.436255	1.47351e-10	1.63696e-09
NIPA2	0.436216	1.47967e-10	1.64278e-09
SPRTN	0.436148	1.49052e-10	1.65381e-09
LARP4	0.436135	1.49258e-10	1.65506e-09
ACOX3	0.436082	1.50108e-10	1.66345e-09
CTDSP2	0.436063	1.5041e-10	1.66577e-09
DAAM1	0.435946	1.52302e-10	1.68568e-09
GON7	0.435855	1.53807e-10	1.70129e-09
COX4I1	0.435839	1.54065e-10	1.7024e-09
SPCS1	0.435837	1.54098e-10	1.7024e-09
NOP10	0.435807	1.54591e-10	1.7068e-09
FAM210A	0.435797	1.54765e-10	1.70766e-09
COG3	0.435788	1.54905e-10	1.70816e-09
PEX7	0.435775	1.55131e-10	1.7096e-09
MPZL1	0.435749	1.55564e-10	1.71331e-09
KMT5A	0.435699	1.56398e-10	1.72143e-09
NMD3	0.435669	1.56892e-10	1.72581e-09
WDSUB1	0.435577	1.58453e-10	1.74192e-09
PKN2	0.435381	1.61807e-10	1.77769e-09
GALK2	0.435374	1.61933e-10	1.77798e-09
RPL36AL	0.435357	1.62214e-10	1.77997e-09
MED11	0.43525	1.6409e-10	1.79892e-09
MGME1	0.435247	1.64142e-10	1.79892e-09
ZFAND6	0.435092	1.6688e-10	1.8274e-09
MTRF1L	0.435088	1.66944e-10	1.8274e-09
HSD17B4	0.435033	1.67941e-10	1.83719e-09
PHF13	0.435025	1.68082e-10	1.83748e-09
TRIP4	0.43502	1.68173e-10	1.83748e-09
ATP2A2	0.435011	1.68336e-10	1.83814e-09
GATAD1	0.435005	1.68445e-10	1.83821e-09
GGCT	0.434962	1.6921e-10	1.84543e-09
DNAJC21	0.434858	1.71099e-10	1.8649e-09
TXLNA	0.434839	1.71452e-10	1.8676e-09
GLO1	0.434653	1.74884e-10	1.90383e-09
DDX19B	0.434628	1.75352e-10	1.90666e-09
PSMD12	0.434628	1.75357e-10	1.90666e-09
PEX14	0.434587	1.76133e-10	1.91393e-09
PRELID1	0.434574	1.76377e-10	1.91542e-09
CCDC12	0.434427	1.7915e-10	1.94436e-09
SMG9	0.434405	1.79585e-10	1.94789e-09
ZGPAT	0.434369	1.80269e-10	1.95414e-09
TOPORS	0.434334	1.80932e-10	1.96013e-09
RICTOR	0.434297	1.81652e-10	1.96566e-09
RDX	0.434297	1.81661e-10	1.96566e-09
COQ9	0.43427	1.82182e-10	1.97009e-09
IMPAD1	0.434186	1.83809e-10	1.98649e-09
VPS11	0.43415	1.84518e-10	1.99295e-09
GPS2	0.43414	1.84725e-10	1.99398e-09
LUC7L2	0.434096	1.85583e-10	2.00203e-09
AP5S1	0.434012	1.87256e-10	2.01887e-09
TRIM46	0.434	1.87486e-10	2.02013e-09
TUBD1	0.433992	1.8766e-10	2.02079e-09
NCSTN	0.433965	1.88195e-10	2.02533e-09
C5orf51	0.433944	1.88619e-10	2.02867e-09
TADA2A	0.433911	1.89284e-10	2.0346e-09
NUP50	0.433844	1.90634e-10	2.04789e-09
SEC11A	0.433788	1.91781e-10	2.05782e-09
PSEN2	0.433782	1.91891e-10	2.05782e-09
HEMK1	0.433782	1.91904e-10	2.05782e-09
COMMD1	0.43377	1.92143e-10	2.05915e-09
MAST4	0.433643	1.94743e-10	2.08577e-09
MLLT10	0.4336	1.9564e-10	2.09412e-09
USP10	0.433523	1.97246e-10	2.11005e-09
TTI2	0.4335	1.97738e-10	2.11405e-09
PPP4R3B	0.433471	1.98343e-10	2.11925e-09
USP22	0.433425	1.99325e-10	2.12847e-09
CFAP97	0.433388	2.00096e-10	2.13543e-09
KDM4C	0.433375	2.00385e-10	2.13724e-09
ZNF511	0.433292	2.02144e-10	2.15472e-09
XPOT	0.433271	2.02617e-10	2.15847e-09
NEK9	0.433214	2.03827e-10	2.16919e-09
DIS3L2	0.433213	2.03866e-10	2.16919e-09
MOSPD3	0.433174	2.04707e-10	2.17685e-09
TAF6	0.433162	2.04956e-10	2.17821e-09
RFX5	0.433093	2.06467e-10	2.19297e-09
PPP2R5E	0.433075	2.06864e-10	2.19588e-09
APLP2	0.432925	2.10178e-10	2.22973e-09
GPAT4	0.432902	2.10705e-10	2.234e-09
CAMKK2	0.43283	2.12304e-10	2.24961e-09
AURKAIP1	0.432615	2.17207e-10	2.30021e-09
YEATS4	0.432577	2.18088e-10	2.30818e-09
PGAM5	0.432567	2.18315e-10	2.30921e-09
NDUFAF5	0.432507	2.19708e-10	2.32195e-09
ATG101	0.432504	2.19779e-10	2.32195e-09
COASY	0.432468	2.20621e-10	2.32947e-09
TTC5	0.432456	2.20898e-10	2.33102e-09
UBR2	0.432437	2.21352e-10	2.33444e-09
ERCC2	0.432378	2.22728e-10	2.34756e-09
RPS17	0.432355	2.23287e-10	2.35207e-09
RTCA	0.432331	2.23853e-10	2.35664e-09
PUS7	0.432324	2.2401e-10	2.35691e-09
PDS5A	0.432292	2.24775e-10	2.36357e-09
PDXK	0.432235	2.26127e-10	2.37639e-09
PSMA1	0.432144	2.2831e-10	2.39792e-09
TCEAL4	0.432129	2.28693e-10	2.39979e-09
UCHL3	0.432126	2.28756e-10	2.39979e-09
REPS1	0.432033	2.3102e-10	2.42213e-09
ZNRF2	0.431932	2.33507e-10	2.44677e-09
MIER1	0.431904	2.34177e-10	2.45235e-09
MRPS7	0.431884	2.34696e-10	2.45635e-09
TOM1L1	0.431842	2.35731e-10	2.46573e-09
HAT1	0.431834	2.35935e-10	2.46643e-09
LAMTOR2	0.4318	2.36767e-10	2.47368e-09
BCL2L12	0.43179	2.37027e-10	2.47496e-09
SAP130	0.431731	2.38518e-10	2.48907e-09
SNRNP48	0.431637	2.40893e-10	2.51239e-09
BORCS8	0.43161	2.41568e-10	2.51796e-09
TMEM203	0.431604	2.41744e-10	2.51833e-09
ABCC10	0.431563	2.42777e-10	2.52762e-09
SMCHD1	0.431512	2.44084e-10	2.53975e-09
PNPT1	0.431431	2.46201e-10	2.56002e-09
LINC01431	0.431426	2.46318e-10	2.56002e-09
LZIC	0.431323	2.49022e-10	2.58662e-09
POLI	0.431262	2.50633e-10	2.60185e-09
BRCC3	0.431249	2.50977e-10	2.6039e-09
CHD8	0.431235	2.51329e-10	2.60604e-09
C12orf73	0.431177	2.52884e-10	2.62065e-09
WRN	0.431096	2.55038e-10	2.64032e-09
SLC38A9	0.431095	2.55077e-10	2.64032e-09
AUH	0.431079	2.55515e-10	2.64332e-09
TUSC2	0.431022	2.57058e-10	2.65775e-09
ZYG11B	0.430953	2.58915e-10	2.6754e-09
DR1	0.43088	2.60919e-10	2.69456e-09
COPB1	0.430822	2.62531e-10	2.70964e-09
MED10	0.430738	2.6485e-10	2.73114e-09
TMED2	0.430736	2.6492e-10	2.73114e-09
RPA3	0.430709	2.65657e-10	2.73717e-09
HGH1	0.430688	2.66244e-10	2.74163e-09
TRMT61A	0.430648	2.67369e-10	2.75164e-09
AMMECR1L	0.430629	2.67912e-10	2.75564e-09
SAV1	0.430616	2.68289e-10	2.75793e-09
SUN1	0.43054	2.70423e-10	2.77828e-09
RPL32	0.430495	2.71712e-10	2.78992e-09
PYGO2	0.430455	2.72878e-10	2.80028e-09
PSPH	0.430349	2.75922e-10	2.8299e-09
ALKBH5	0.430314	2.76936e-10	2.83867e-09
STRN3	0.430308	2.77114e-10	2.83887e-09
TM9SF1	0.43026	2.78513e-10	2.85157e-09
UBAP2	0.430164	2.81343e-10	2.8789e-09
TIMM21	0.430156	2.81591e-10	2.8798e-09
CRK	0.430024	2.85532e-10	2.91842e-09
FAM91A1	0.429966	2.87264e-10	2.93446e-09
MIPEP	0.429872	2.90128e-10	2.96202e-09
FKBPL	0.429842	2.91028e-10	2.96951e-09
ZNF654	0.429743	2.94065e-10	2.99879e-09
PSMD9	0.429733	2.94373e-10	3.00023e-09
TARS	0.429724	2.9465e-10	3.00133e-09
NELFB	0.429709	2.95136e-10	3.00458e-09
SPAG7	0.429662	2.96597e-10	3.01773e-09
TRAPPC6B	0.429656	2.96774e-10	3.01782e-09
NOM1	0.42954	3.00398e-10	3.05293e-09
POLH	0.429535	3.00568e-10	3.05293e-09
TOMM40L	0.42952	3.01031e-10	3.0559e-09
MAPK1	0.42951	3.01355e-10	3.05745e-09
SPTLC2	0.429481	3.02266e-10	3.06496e-09
ANXA7	0.429354	3.06337e-10	3.10448e-09
CCNL2	0.429228	3.10398e-10	3.14385e-09
MTMR4	0.42919	3.11619e-10	3.15443e-09
RPL30	0.429164	3.12471e-10	3.16128e-09
STOML2	0.42914	3.13272e-10	3.16738e-09
AP4B1	0.429135	3.13429e-10	3.16738e-09
GTF2E1	0.429095	3.14745e-10	3.17889e-09
AZI2	0.429022	3.17161e-10	3.20148e-09
CEP63	0.429006	3.17694e-10	3.20506e-09
RPL6	0.42895	3.19575e-10	3.22222e-09
MTG2	0.42891	3.20913e-10	3.23389e-09
GCNT2	0.428827	3.23701e-10	3.26015e-09
SIKE1	0.42879	3.24953e-10	3.27092e-09
DGCR2	0.428752	3.26269e-10	3.28231e-09
ARL4A	0.428741	3.26653e-10	3.28433e-09
ZNF398	0.428673	3.28954e-10	3.30561e-09
RNF34	0.428637	3.30216e-10	3.31643e-09
PSEN1	0.428594	3.31704e-10	3.32818e-09
AGO2	0.428592	3.31758e-10	3.32818e-09
DNAJA2	0.428532	3.33864e-10	3.34598e-09
CNEP1R1	0.428531	3.33906e-10	3.34598e-09
IDH3G	0.428494	3.35194e-10	3.35701e-09
MKLN1	0.428468	3.36105e-10	3.36424e-09
ZBTB25	0.428428	3.37519e-10	3.37651e-09
GEMIN5	0.428362	3.39855e-10	3.39798e-09
ALKBH7	0.42829	3.42406e-10	3.42157e-09
RNF20	0.428222	3.44861e-10	3.44418e-09
ACLY	0.428202	3.45559e-10	3.44923e-09
MEPCE	0.42818	3.46365e-10	3.45534e-09
SPINK13	0.428172	3.46657e-10	3.45633e-09
SUGP2	0.428066	3.5052e-10	3.4929e-09
ATP6V0D1	0.428009	3.52614e-10	3.51181e-09
MCMBP	0.428003	3.52843e-10	3.51215e-09
TP53RK	0.427995	3.53132e-10	3.51306e-09
TTLL1	0.427664	3.6554e-10	3.63448e-09
TRIP13	0.427616	3.67368e-10	3.65063e-09
MANSC1	0.427609	3.67641e-10	3.65132e-09
TOR1AIP1	0.427549	3.69937e-10	3.67208e-09
BICD1	0.427402	3.75664e-10	3.72686e-09
SLC25A3	0.427388	3.76218e-10	3.73029e-09
PPIH	0.427369	3.76961e-10	3.73559e-09
TRIP12	0.42732	3.78866e-10	3.75239e-09
TSNAX	0.427283	3.80326e-10	3.76477e-09
CYTH2	0.427169	3.84883e-10	3.80777e-09
SCFD2	0.427151	3.85594e-10	3.81269e-09
MTMR12	0.427102	3.87559e-10	3.83001e-09
COMMD3	0.427059	3.89328e-10	3.84537e-09
SVBP	0.42698	3.92516e-10	3.87471e-09
EXT1	0.426973	3.92825e-10	3.87563e-09
CCNJL	0.426895	3.96e-10	3.9048e-09
LEPROTL1	0.42683	3.98693e-10	3.92919e-09
ZNF101	0.426755	4.01834e-10	3.9541e-09
ARHGEF5	0.426755	4.01844e-10	3.9541e-09
GABARAPL2	0.426754	4.01884e-10	3.9541e-09
BOLA1	0.426732	4.02772e-10	3.96067e-09
RPL7	0.42662	4.07517e-10	4.00513e-09
KLHDC10	0.426608	4.07997e-10	4.00764e-09
PLEKHF2	0.42659	4.08765e-10	4.01298e-09
RPP25L	0.426548	4.10581e-10	4.0286e-09
NAT9	0.426508	4.12283e-10	4.04298e-09
GOLGA5	0.426503	4.12499e-10	4.04298e-09
UBE2N	0.426368	4.18324e-10	4.09783e-09
UFSP2	0.426357	4.18809e-10	4.10034e-09
TCF25	0.426276	4.22315e-10	4.13241e-09
THYN1	0.426252	4.23381e-10	4.14058e-09
MED4	0.426217	4.24936e-10	4.15351e-09
ZNF222	0.426196	4.25834e-10	4.16001e-09
GMPS	0.426174	4.26817e-10	4.16597e-09
TNIP1	0.426172	4.26909e-10	4.16597e-09
CETN3	0.426155	4.27654e-10	4.17097e-09
PP7080	0.426128	4.28849e-10	4.18035e-09
DPAGT1	0.426102	4.30025e-10	4.18953e-09
TCTN3	0.425991	4.3502e-10	4.23523e-09
ZNF184	0.425987	4.3519e-10	4.23523e-09
DPY19L3	0.425977	4.3562e-10	4.23711e-09
KLHL42	0.425932	4.37692e-10	4.25496e-09
NOC2L	0.425924	4.38056e-10	4.25618e-09
FBXL15	0.42579	4.44179e-10	4.31333e-09
MDH1	0.425779	4.44655e-10	4.31561e-09
SPIDR	0.425769	4.45137e-10	4.31795e-09
KAT8	0.425695	4.48534e-10	4.34854e-09
CCNC	0.425671	4.49663e-10	4.35713e-09
SNTB2	0.425652	4.50552e-10	4.36338e-09
FANCG	0.425577	4.54075e-10	4.39512e-09
DGUOK	0.42545	4.60061e-10	4.45066e-09
DENND1B	0.425429	4.61082e-10	4.45812e-09
MINPP1	0.425415	4.61767e-10	4.46233e-09
SMIM19	0.425286	4.67963e-10	4.51977e-09
VAPB	0.425197	4.72297e-10	4.55917e-09
SUPT4H1	0.425166	4.73813e-10	4.57133e-09
MOGS	0.425089	4.77608e-10	4.60547e-09
IMMP2L	0.425058	4.79145e-10	4.6178e-09
ASXL2	0.425038	4.80116e-10	4.62467e-09
DIAPH1	0.425016	4.81217e-10	4.63278e-09
CYC1	0.424993	4.82373e-10	4.63968e-09
MAN2A1	0.424986	4.82687e-10	4.63968e-09
TMBIM6	0.424986	4.82711e-10	4.63968e-09
ZNF430	0.42494	4.85014e-10	4.65843e-09
CWF19L1	0.424936	4.85183e-10	4.65843e-09
KIAA0355	0.424781	4.93027e-10	4.73121e-09
PNP	0.424719	4.96202e-10	4.75864e-09
EXOSC5	0.424715	4.96417e-10	4.75864e-09
RPLP0	0.42468	4.98213e-10	4.77329e-09
PIK3R4	0.424639	5.00311e-10	4.79064e-09
TBCE	0.424634	5.00559e-10	4.79064e-09
MRPL2	0.42462	5.0131e-10	4.79445e-09
NRBF2	0.424616	5.01492e-10	4.79445e-09
YBX1	0.42461	5.01832e-10	4.79514e-09
PRR13	0.42459	5.02871e-10	4.8025e-09
ZNF384	0.424482	5.08516e-10	4.85382e-09
DDX59	0.424472	5.09029e-10	4.85612e-09
ACTR8	0.424401	5.12784e-10	4.88935e-09
CCDC149	0.424361	5.14896e-10	4.90686e-09
CEP192	0.424319	5.17109e-10	4.92533e-09
IFI27L1	0.424276	5.19411e-10	4.94463e-09
COPG2	0.424238	5.21463e-10	4.96152e-09
CHD3	0.424207	5.2314e-10	4.97483e-09
KIF5B	0.424175	5.24836e-10	4.98729e-09
LRRC58	0.424172	5.25007e-10	4.98729e-09
PITPNB	0.424097	5.29122e-10	5.02212e-09
C2CD5	0.424094	5.29235e-10	5.02212e-09
NOP9	0.424072	5.30457e-10	5.03105e-09
IKZF5	0.42401	5.33852e-10	5.06056e-09
EMC8	0.423946	5.37377e-10	5.09104e-09
ALAD	0.423942	5.37636e-10	5.09104e-09
MBD1	0.423909	5.39434e-10	5.10537e-09
TMEM120A	0.423887	5.40698e-10	5.11463e-09
GBA2	0.423821	5.44358e-10	5.14653e-09
DCAF6	0.423777	5.46837e-10	5.16724e-09
EXOSC1	0.423725	5.49741e-10	5.19157e-09
PARS2	0.423721	5.49993e-10	5.19157e-09
MASTL	0.423701	5.51109e-10	5.19677e-09
FAM76A	0.423701	5.51124e-10	5.19677e-09
ACAA1	0.423641	5.5454e-10	5.22622e-09
SHB	0.423622	5.55619e-10	5.23364e-09
TRMT13	0.423587	5.57621e-10	5.24843e-09
CLPP	0.423584	5.57776e-10	5.24843e-09
C8orf33	0.423525	5.61194e-10	5.27782e-09
SRPRB	0.423446	5.65769e-10	5.31805e-09
ARFIP1	0.423435	5.66444e-10	5.3216e-09
ZNF3	0.423327	5.72725e-10	5.37778e-09
PARG	0.423298	5.74461e-10	5.39007e-09
RPP14	0.423295	5.74636e-10	5.39007e-09
PDSS2	0.423249	5.77358e-10	5.41277e-09
OSER1	0.423191	5.80831e-10	5.44247e-09
ZMYM1	0.423149	5.83321e-10	5.46295e-09
ALG5	0.42311	5.85638e-10	5.48178e-09
GPS1	0.423092	5.86739e-10	5.48921e-09
NSMAF	0.423055	5.8901e-10	5.50758e-09
EIF4EBP1	0.422939	5.96014e-10	5.57016e-09
KMT5B	0.42293	5.96582e-10	5.57256e-09
C1QBP	0.42287	6.00286e-10	5.60424e-09
ECSIT	0.422805	6.04325e-10	5.639e-09
FAM3A	0.422754	6.0746e-10	5.6653e-09
ZCCHC8	0.422686	6.11692e-10	5.70179e-09
BSDC1	0.422647	6.14188e-10	5.72208e-09
ARHGEF11	0.42258	6.18409e-10	5.75841e-09
PCBP1	0.422573	6.18833e-10	5.75937e-09
TMF1	0.422491	6.241e-10	5.80537e-09
PROSER2	0.422429	6.28053e-10	5.83909e-09
IPO7	0.422384	6.3096e-10	5.86308e-09
PARPBP	0.422372	6.31732e-10	5.86721e-09
ZPR1	0.422362	6.32372e-10	5.8701e-09
MUTYH	0.42234	6.33835e-10	5.88064e-09
C7orf50	0.422282	6.376e-10	5.9125e-09
WWC1	0.422252	6.39571e-10	5.92771e-09
ABHD11	0.422225	6.41345e-10	5.93878e-09
ZNF506	0.422222	6.41519e-10	5.93878e-09
SNX33	0.422218	6.41761e-10	5.93878e-09
SYS1	0.422182	6.44147e-10	5.95778e-09
COG4	0.42217	6.4495e-10	5.96212e-09
DBR1	0.422158	6.45771e-10	5.96663e-09
MTRF1	0.422105	6.49278e-10	5.99594e-09
PHF11	0.421963	6.58763e-10	6.08039e-09
SNX11	0.421896	6.63315e-10	6.11612e-09
ZSWIM1	0.421896	6.63317e-10	6.11612e-09
PIK3C3	0.421858	6.65892e-10	6.1367e-09
LSM14B	0.421848	6.66577e-10	6.13985e-09
TSC22D4	0.421756	6.72893e-10	6.19484e-09
C17orf75	0.42175	6.73281e-10	6.19522e-09
MRPS36	0.421506	6.90258e-10	6.34817e-09
ANKRD17	0.421428	6.95824e-10	6.39607e-09
FASTKD2	0.421359	7.00726e-10	6.43783e-09
CUTA	0.421347	7.01588e-10	6.44244e-09
HEATR1	0.421237	7.09548e-10	6.5122e-09
CTBP2	0.421224	7.10441e-10	6.51705e-09
IFT88	0.421088	7.20361e-10	6.60466e-09
SQSTM1	0.421077	7.21229e-10	6.60923e-09
NR2C2	0.420916	7.33134e-10	6.71489e-09
ASXL1	0.42089	7.3511e-10	6.72955e-09
NEDD1	0.420843	7.38638e-10	6.75839e-09
APOPT1	0.420814	7.40789e-10	6.7746e-09
SPRYD7	0.420671	7.51713e-10	6.87099e-09
UBXN8	0.420666	7.521e-10	6.87103e-09
PLEKHF1	0.420644	7.53758e-10	6.88265e-09
SNIP1	0.420629	7.54914e-10	6.8897e-09
ZW10	0.420596	7.57427e-10	6.90911e-09
CARS2	0.420587	7.5814e-10	6.91209e-09
DNAJC5	0.420558	7.60364e-10	6.92884e-09
EXOC1	0.420534	7.6223e-10	6.94231e-09
TMEM192	0.420522	7.63173e-10	6.94454e-09
MYO5B	0.420521	7.63252e-10	6.94454e-09
OLA1	0.420481	7.66359e-10	6.96928e-09
FAM104A	0.420399	7.72845e-10	7.02469e-09
ESCO1	0.420384	7.74009e-10	7.0317e-09
LSS	0.420371	7.75006e-10	7.03718e-09
NOL6	0.420362	7.75701e-10	7.03992e-09
ZNF823	0.420288	7.81567e-10	7.08956e-09
EXOC7	0.420206	7.88178e-10	7.14551e-09
KIF13B	0.420201	7.88533e-10	7.14551e-09
PRKD2	0.420188	7.89595e-10	7.15151e-09
GMEB2	0.420151	7.92586e-10	7.17497e-09
TASP1	0.420139	7.93503e-10	7.17963e-09
GNPTG	0.420122	7.94949e-10	7.18909e-09
CABLES1	0.419963	8.07846e-10	7.30203e-09
SNX5	0.419558	8.41781e-10	7.60492e-09
OXA1L	0.419547	8.42732e-10	7.60776e-09
MRPL20	0.419545	8.42945e-10	7.60776e-09
RTN4IP1	0.41953	8.44236e-10	7.61557e-09
PTK7	0.419517	8.45292e-10	7.62126e-09
STAU2	0.419454	8.50793e-10	7.66699e-09
HDDC2	0.419416	8.5403e-10	7.69114e-09
TMEM187	0.419413	8.54333e-10	7.69114e-09
ZNF251	0.419404	8.55064e-10	7.69386e-09
E2F5	0.419348	8.59983e-10	7.73423e-09
MYL12B	0.419216	8.71509e-10	7.83395e-09
ZNF766	0.419118	8.8028e-10	7.90882e-09
ZMIZ2	0.41903	8.88106e-10	7.97513e-09
UBXN1	0.418963	8.94226e-10	8.02606e-09
SUMF1	0.41893	8.97207e-10	8.04878e-09
PAXIP1	0.418893	9.00529e-10	8.07209e-09
SQLE	0.418891	9.00707e-10	8.07209e-09
DNAAF2	0.418799	9.09204e-10	8.14416e-09
[truncated: 476 more rows]

## Sheet: Table.S3
Table S3: Significantly amplified and deleted gene regions with significant correlation for their mRNA-Copy number in samples with LOH in KRAS with respect to no LOH samples.
Gene	Copy Number State	Expression Level
CDC14A	Amplified	Upregulated
EXOSC10	Amplified	Upregulated
FAHD2A	Amplified	Upregulated
GPSM2	Amplified	Upregulated
GUSB	Amplified	Upregulated
IGSF8	Amplified	Upregulated
IQGAP3	Amplified	Upregulated
LINC00174	Amplified	Upregulated
NOS1AP	Amplified	Upregulated
NUP210L	Amplified	Upregulated
PMS2P5	Amplified	Upregulated
SCUBE3	Amplified	Upregulated
STPG1	Amplified	Upregulated
UBXN11	Amplified	Upregulated
ZNF391	Amplified	Upregulated
ABHD13	Deleted	Downregulated
AEBP2	Deleted	Downregulated
ASB8	Deleted	Downregulated
ATAD1	Deleted	Downregulated
ATF1	Deleted	Downregulated
AVEN	Deleted	Downregulated
BORCS7	Deleted	Downregulated
C12orf66	Deleted	Downregulated
C1RL	Deleted	Downregulated
C2CD5	Deleted	Downregulated
CCDC186	Deleted	Downregulated
CCDC59	Deleted	Downregulated
CCDC91	Deleted	Downregulated
COPS2	Deleted	Downregulated
CUTC	Deleted	Downregulated
DERA	Deleted	Downregulated
DNM1L	Deleted	Downregulated
EIF3A	Deleted	Downregulated
EIF3F	Deleted	Downregulated
EIF3J	Deleted	Downregulated
EIF4B	Deleted	Downregulated
ELP5	Deleted	Downregulated
EMG1	Deleted	Downregulated
ERGIC2	Deleted	Downregulated
ERLIN1	Deleted	Downregulated
ETNK1	Deleted	Downregulated
FAM204A	Deleted	Downregulated
FGFR1OP2	Deleted	Downregulated
GABARAPL1	Deleted	Downregulated
GTF2F2	Deleted	Downregulated
IPO7	Deleted	Downregulated
IPO8	Deleted	Downregulated
IRS2	Deleted	Downregulated
KCTD10	Deleted	Downregulated
KRAS	Deleted	Downregulated
LEMD3	Deleted	Downregulated
MAGOHB	Deleted	Downregulated
MAPKAPK5-AS1	Deleted	Downregulated
MRPS35	Deleted	Downregulated
MTMR6	Deleted	Downregulated
NACA	Deleted	Downregulated
NDUFA9	Deleted	Downregulated
NUDT15	Deleted	Downregulated
NUP37	Deleted	Downregulated
PARP4	Deleted	Downregulated
PCDHB15	Deleted	Downregulated
PCGF5	Deleted	Downregulated
POLR1D	Deleted	Downregulated
POMP	Deleted	Downregulated
PYROXD1	Deleted	Downregulated
RFK	Deleted	Downregulated
RND1	Deleted	Downregulated
RPS27L	Deleted	Downregulated
RSL24D1	Deleted	Downregulated
SCAF11	Deleted	Downregulated
SFR1	Deleted	Downregulated
SHOC2	Deleted	Downregulated
SLC43A2	Deleted	Downregulated
SMIM10L1	Deleted	Downregulated
SMNDC1	Deleted	Downregulated
SPTY2D1	Deleted	Downregulated
STRAP	Deleted	Downregulated
TFCP2	Deleted	Downregulated
TM7SF3	Deleted	Downregulated
UBE2F	Deleted	Downregulated
UBR1	Deleted	Downregulated
USP3	Deleted	Downregulated
WBP11	Deleted	Downregulated
ZDHHC17	Deleted	Downregulated
ZNF511	Deleted	Downregulated

## Sheet: Table.S4
Table S4: Geneset enrichment analysis of significantly amplified and deleted gene regions with significant correlation for their mRNA-Copy number in samples with LOH in KRAS with respect to no LOH samples.
Category	Term	Count	%	PValue	Genes	List Total	Pop Hits	Pop Total	Fold Enrichment	Bonferroni	Benjamini	FDR
GOTERM_MF_DIRECT	GO:0005515~protein binding	55	64.7059	0.000184049	AVEN, ATF1, GPSM2, PYROXD1, IRS2, IPO7, CDC14A, RND1, IPO8, SFR1, FGFR1OP2, DNM1L, NUDT15, BORCS7, GABARAPL1, PARP4, SCAF11, WBP11, LEMD3, GTF2F2, ZDHHC17, KCTD10, NOS1AP, POLR1D, STRAP, ZNF511, ERGIC2, IGSF8, POMP, RPS27L, MTMR6, SCUBE3, EMG1, EXOSC10, SHOC2, SMNDC1, EIF4B, UBE2F, NDUFA9, PCGF5, CCDC59, ERLIN1, ELP5, MAGOHB, TFCP2, UBXN11, ETNK1, COPS2, EIF3J, KRAS, EIF3F, RSL24D1, CUTC, EIF3A, …	75	8785	16881	1.40915	0.0252607	0.0255829	0.0255829
GOTERM_MF_DIRECT	GO:0003743~translation initiation factor activity	4	4.70588	0.00242513	EIF3J, EIF3F, EIF3A, EIF4B	75	61	16881	14.7593	0.28645	0.168546	0.168546
GOTERM_MF_DIRECT	GO:0044822~poly(A) RNA binding	12	14.1176	0.00981271	EMG1, EXOSC10, MRPS35, SCAF11, CCDC59, STRAP, RPS27L, WBP11, MAGOHB, SMNDC1, EIF3A, EIF4B	75	1129	16881	2.39235	0.746071	0.454655	0.454655
GOTERM_MF_DIRECT	GO:0030695~GTPase regulator activity	2	2.35294	0.0719976	GPSM2, IPO7	75	17	16881	26.48	0.999969	1	1
Category	Term	Count	%	PValue	Genes	List Total	Pop Hits	Pop Total	Fold Enrichment	Bonferroni	Benjamini	FDR
KEGG_PATHWAY	hsa03013:RNA transport	8	9.41176	1.64494e-05	NUP210L, EIF3J, STRAP, EIF3F, MAGOHB, EIF3A, EIF4B, NUP37	35	172	6879	9.14153	0.00161076	0.00161204	0.00161204
